# Supplementary material
Source: PubMed Central journal article supplement (PMC4343289)
Supplement: supp_mcu253_aob-14600-s03.pdf [file supp_mcu253_aob-14600-s03.pdf]

File S1. Species and Genbank accession numbers for samples used in the analysis. Generic names in parentheses indicate most recent placement.

*Cryptostylis*:

ITS: AF348015\_*Cryptostylis\_subulata*  
matK: AJ310015\_*Cryptostylis\_subulata*  
psaB: AY380976\_*Cryptostylis\_arachnites*  
rbcL: AF074140\_*Cryptostylis\_subulata*  
xdh: GU004501\_*Cryptostylis\_subulata*

*Paphiopedilum*:

ITS: HQ998474\_*Paphiopedilum\_venustum*  
matK: AY368379\_*Paphiopedilum\_delenatii*  
nad1: AF314831\_*Paphiopedilum\_delenatii*  
psaB: AY381052\_*Paphiopedilum\_philippinense*  
rbcL: AF074209\_*Paphiopedilum\_sukhakulii*  
xdh: GU004515\_*Paphiopedilum\_niveum*  
ycfla: EU490760\_*Paphiopedilum\_delenatii*

*Platanthera*:

ITS: EF025535\_*Platanthera\_aquilonis*  
matK: AF263678\_*Platanthera\_ciliaris*  
psaB: AY381057\_*Platanthera\_obtusata*  
rbcL: AF074215\_*Platanthera\_ciliaris*  
xdh: GU004483\_*Platanthera\_chlorantha*

*Spiranthes*:

ITS: FJ473353\_*Spiranthes\_romanzoffiana*  
matK: GQ405594\_*Spiranthes\_australis*  
psaB: FJ571254\_*Spiranthes\_romanzoffiana*  
rbcL: FJ571354\_*Spiranthes\_romanzoffiana*  
ycfla: EU490785\_*Spiranthes\_venalis*

*Acacallis\_fimbriata*:

ITS: AY870105\_*Acacallis\_fimbriata*  
matK: AY870006\_*Acacallis\_fimbriata*  
trnLF: AY869908\_*Acacallis\_fimbriata*

*Acampe*:

ITS: AB217525\_*Acampe\_ochracea*  
matK: AB217701\_*Acampe\_ochracea*  
nad1: EF464102\_ *Acampe\_sp.*  
trnLF: DQ091438\_*Acampe\_ochracea*

*Acanthephippium*:

ITS: AF521081\_*Acanthephippium\_mantinianum*  
matK: AF263618\_*Acanthephippium\_mantinianum*  
nad1: AF314843\_*Acanthephippium\_mantinianum*  
psaB: AY380927\_*Acanthephippium\_mantinianum*  
rbcL: AF074100\_*Acanthephippium\_mantinianum*  
trnLF: AF519966\_*Acanthephippium\_mantinianum*

Acineta:

ITS: AF239379\_Acineta\_superba  
matK: AF239475\_Acineta\_superba  
psaB: AY380929\_Acineta\_chrysantha  
trnLF: AF239571\_Acineta\_superba

Acostea\_costaricensis:

ITS: AF262865\_Acostaea\_costaricensis  
matK: AF265457\_Acostaea\_costaricensis  
trnLF: AF265507\_Acostaea\_costaricensis

Acriopsis:

ITS: AF470492\_Acriopsis\_javanica  
matK: AF470462\_Acriopsis\_javanica  
nad1: AF314844\_Acriopsis\_sp.  
rbcL: AY368350\_Acriopsis\_sp.

Acrorchis\_roseola:

ITS: AY174761\_Acrorchis\_roseola  
matK: AY396086\_Acrorchis\_roseola  
trnLF: AY422389\_Acrorchis\_roseola

Ada (Brassia):

ITS: AF350518\_Ada\_aurantiaca  
matK: AF239492\_Ada\_aurantiaca  
psaB: FJ534337\_Ada\_elegantula  
rbcL: FJ534215\_Ada\_elegantula  
trnLF: AF350676\_Ada\_aurantiaca  
ycfla: FJ563651\_Ada\_elegantula  
ycflb: FJ562940\_Ada\_elegantula

Aerangis:

ITS: DQ091600\_Aerangis\_citrata  
matK: DQ091337\_Aerangis\_citrata  
psaB: AY380931\_Aerangis\_ugandensis  
trnLF: DQ091461\_Aerangis\_citrata  
ycfla: EU490715\_Aerangis\_citrata

Aeranthes:

ITS: AF521083\_Aeranthes\_grandiflora  
matK: AY121745\_Aeranthes\_grandiflora  
nad1: AF314845\_Aeranthes\_ramosa  
psaB: AY380932\_Aeranthes\_grandiflora  
trnLF: DQ091537\_Aeranthes\_grandiflora  
ycfla: EU490716\_Aeranthes\_grandiflora

Aerides\_flabellata:

ITS: AB217528\_Aerides\_flabellata  
matK: AB217704\_Aerides\_flabellata  
trnLF: EF670410\_Aerides\_flabellata

Aganisia\_pulchella:

ITS: AY870106\_Aganisia\_pulchella  
matK: AY870007\_Aganisia\_pulchella

trnLF: AY869909\_Aganisia\_pulchella

Agrostophyllum\_majus:

ITS: AF521080\_Agrostophyllum\_majus  
matK: AY368391\_Agrostophyllum\_majus  
nad1: AF314846\_Agrostophyllum\_majus  
rbcL: AF518054\_Agrostophyllum\_majus  
trnLF: AF519964\_Agrostophyllum\_majus

Alamania\_punicea:

ITS: AF260177\_Alamania\_punicea  
matK: AF263783\_Alamania\_punicea  
trnLF: AY422452\_Alamania\_punicea

Amblostoma (Epidendrum) armeniacum:

ITS: AF260165\_Amblostoma\_armeniaceum  
matK: AF263748\_Amblostoma\_armeniaceum  
rbcL: AF518058\_Amblostoma\_armeniaceum  
trnLF: AF266993\_Amblostoma\_armeniaceum

Amesiella\_philippinensis:

ITS: EF079433\_Amesiella\_philippinensis  
matK: DQ091319\_Amesiella\_philippinensis  
trnLF: DQ091443\_Amesiella\_philippinensis

Amparoa (Rhynchosyche) costaricensis:

ITS: AF350531\_Amparoa\_costaricensis  
matK: AF350610\_Amparoa\_costaricensis  
trnLF: AF350689\_Amparoa\_costaricensis

Ancistrochilus\_roths:

ITS: AF521061\_Ancistrochilus\_rothschildianus  
matK: AY121729\_Ancistrochilus\_rothschildianus  
rbcL: AF264152\_Ancistrochilus\_rothschildianus  
trnLF: AF519928\_Ancistrochilus\_rothschildianus  
ycfla: EU490717\_Ancistrochilus\_rothschildianus

Angraecum:

ITS: EF079442\_Angraecum\_eburneum  
matK: EF065569\_Angraecum\_eburneum  
nad1: EF464100\_Angraecum\_eburneum  
psaB: AY380933\_Angraecum\_comorense  
rbcL: AF074106\_Angraecum\_sesquipedale  
trnLF: DQ091545\_Angraecum\_eburneum\_subsp\_xerophilum  
xdh: GU004415\_Angraecum\_eburneum

Anguloa:

ITS: AF239333\_Anguloa\_hohenlohii  
matK: AF239429\_Anguloa\_hohenlohii  
trnLF: AF239525\_Anguloa\_hohenlohii  
xdh: GU004388\_Anguloa\_x\_ruckeri

Ansellia:

ITS: AF470491\_Ansellia\_africana

matK: EF079259\_Ansellia\_africana  
nad1: AF314847\_Ansellia\_gigantea  
psaB: AY380934\_Ansellia\_africana  
rbcL: AF074107\_Ansellia\_gigantea

*Anthogonium gracile*:

ITS: AF521062\_Anthogonium\_gracile  
matK: AF263622\_Anthogonium\_gracile  
rbcL: AF264153\_Anthogonium\_gracile  
trnLF: AF519930\_Anthogonium\_gracile  
xdh: GU004425\_Anthogonium\_gracile

*Aplectrum hyemale*:

ITS: AY008468\_Aplectrum\_hyemale  
matK: EU266416\_Aplectrum\_hyemale  
nad1: AF314848\_Aplectrum\_hyemale  
psaB: AY380935\_Aplectrum\_hyemale  
rbcL: AF074108\_Aplectrum\_hyemale  
trnLF: EU266434\_Aplectrum\_hyemale

*Appendicula cornuta*:

ITS: AF521073\_Appendicula\_cornuta  
matK: AY368393\_Appendicula\_cornuta  
nad1: AF314849\_Appendicula\_cornuta  
rbcL: AY368352\_Appendicula\_cornuta  
trnLF: AF519956\_Appendicula\_cornuta

*Arethusa*:

ITS: AF273339\_Arethusa\_bulbosa  
matK: AF263624\_Arethusa\_bulbosa  
psaB: AY380938\_Arethusa\_bulbosa  
rbcL: AF264154\_Arethusa\_bulbosa  
trnLF: AF519912\_Arethusa\_bulbosa

*Arpophyllum giganteum*:

ITS: AF266742\_Arpophyllum\_giganteum  
matK: AF263768\_Arpophyllum\_giganteum  
nad1: AF314850\_Arpophyllum\_giganteum  
psaB: AY380939\_Arpophyllum\_giganteum  
rbcL: AF074110\_Arpophyllum\_giganteum  
trnLF: AF266975\_Arpophyllum\_giganteum  
xdh: GU004454\_Arpophyllum\_giganteum

*Artorima erubescens*:

ITS: EF079374\_Artorima\_erubescens  
matK: EF065587\_Artorima\_erubescens  
nad1: EF464104\_Artorima\_erubescens  
trnLF: AY422449\_Artorima\_erubescens

*Arundina graminifolia*:

ITS: AF461461\_Arundina\_graminifolia  
matK: EF079333\_Arundina\_graminifolia  
psaB: AY380940\_Arundina\_graminifolia  
rbcL: AF074111\_Arundina\_graminifolia

trnLF: AF519931\_Arundina\_graminifolia  
xdh: GU004420\_Arundina\_graminifolia

Ascocentrum (Vanda):

ITS: EF079434\_Ascocentrum\_ampullaceum  
matK: EF655789\_Ascocentrum\_curvifolium  
trnLF: EF670423\_Ascocentrum\_curvifolium  
xdh: GU004412\_Ascocentropsis\_pusilla  
ycfla: EU490718\_Ascocentrum\_miniatum

Aspasia\_lunata:

ITS: EF079406\_Aspasia\_lunata  
matK: EF079200\_Aspasia\_lunata  
psaB: FJ534283\_Aspasia\_lunata  
rbcL: FJ534160\_Aspasia\_lunata  
trnLF: FJ562360\_Aspasia\_lunata  
ycfla: FJ563257\_Aspasia\_lunata  
ycflb: FJ562563\_Aspasia\_lunata

Barbosella:

ITS: AF262815\_Barbosella\_cucullata  
matK: AF265483\_Barbosella\_cucullata  
nad1: EF464160\_Barbosella\_dolichorhiza  
trnLF: AF265525\_Barbosella\_cucullata

Barkeria:

ITS: AF260170\_Barkeria\_whartonia  
matK: EF079287\_Barkeria\_spectabilis  
trnLF: AF266999\_Barkeria\_whartonia

Basiphyllaea\_hamiltoniana:

ITS: AF521050\_Basiphyllaea\_hamiltoniana  
matK: EU490676\_Basiphyllaea\_hamiltoniana  
rbcL: AF518026\_Basiphyllaea\_hamiltoniana  
trnLF: AF519903\_Basiphyllaea\_hamiltoniana  
ycfla: EU490720\_Basiphyllaea\_hamiltoniana

Batemania\_colleyi:

ITS: AF239343\_Batemania\_colleyi  
matK: AF239439\_Batemania\_colleyi  
trnLF: AF239535\_Batemania\_colleyi

Benzingia\_caudata:

ITS: AY870027\_Benzingia\_caudata  
matK: AY869928\_Benzingia\_caudata  
trnLF: AY869842\_Benzingia\_caudata

Bifrenaria:

ITS: AF239336\_Bifrenaria\_atropurpurea  
matK: AF239432\_Bifrenaria\_atropurpurea  
nad1: AF314851\_Bifrenaria\_harrisoniae  
psaB: AY380941\_Bifrenaria\_harrisoniae  
rbcL: AF074112\_Bifrenaria\_harrisoniae  
trnLF: AF2395281\_Bifrenaria\_atropurpurea

ycfla: EU490721\_Bifrenaria\_tyrianthina

Bletia:

ITS: DQ445825\_Bletia\_parkinsonii  
matK: AF263628\_Bletia\_parkinsonii  
nad1: AF314852\_Bletia\_sp  
psaB: AY380942\_Bletia\_sp  
rbcL: AF264156\_Bletia\_parkinsonii  
trnLF: AY008451\_Bletia\_purpurea  
xdh: GU004461\_Bletia\_patula  
ycfla: EU490722\_Bletia\_purpurea

Bletilla:

ITS: AF273334\_Bletilla\_striata  
matK: AF263630\_Bletilla\_striata  
nad1: AF314853\_Bletilla\_striata  
psaB: AY380943\_Bletilla\_striata  
rbcL: AF074114\_Bletilla\_striata  
trnLF: AF519939\_Bletilla\_striata  
xdh: GU004424\_Bletilla\_ochracea  
ycfla: EU490723\_Bletilla\_striata

Bolusiella\_maudiae:

ITS: DQ091664\_Bolusiella\_maudiae  
matK: DQ091355\_Bolusiella\_maudiae  
trnLF: DQ091480\_Bolusiella\_maudiae

Bonniera (Angraecum) appendiculata:

ITS: DQ091752\_Bonniera\_appendiculata  
matK: DQ091416\_Bonniera\_appendiculata  
trnLF: DQ091541\_Bonniera\_appendiculata

Brachionidium\_valerioi:

ITS: AF291098\_Brachionidium\_valerioi  
matK: AF265488\_Brachionidium\_valerioi  
trnLF: AF291102\_Brachionidium\_valerioi

Brachtia (Brassia) andina:

ITS: AF350525\_Brachtia\_andina  
matK: AF350604\_Brachtia\_andina  
psaB: FJ534358\_Brachtia\_andina  
rbcL: FJ534236\_Brachtia\_andina  
trnLF: AF350683\_Brachtia\_andina  
ycfla: FJ563221\_Brachtia\_andina  
ycflb: FJ563041\_Brachtia\_andina

Braemia\_vittata:

ITS: AF239380\_Braemia\_vittata  
matK: AF239476\_Braemia\_vittata  
trnLF: AF239572\_Braemia\_vittata

Brassavola\_cucullata:

ITS: AF260218\_Brassavola\_cucullata  
matK: AF263819\_Brassavola\_cucullata

trnLF: AF267058\_Brassavola\_cucullata

Brassia:

ITS: AF350522\_Brassia\_arcuigera  
matK: AF239499\_Brassia\_arcuigera  
psaB: FJ534314\_Brassia\_arcuigera  
rbcL: FJ534192\_Brassia\_arcuigera  
trnLF: AF350680\_Brassia\_arcuigera  
ycfla: FJ563570\_Brassia\_aurorae  
ycflb: FJ562858\_Brassia\_arcuigera

Brevilongium (Otoglossum) globuliferum:

ITS: EF079411\_Brevilongium\_globuliferum  
matK: FJ565119\_Brevilongium\_globuliferum  
nad1: EF464144\_Brevilongium\_globuliferum  
trnLF: FJ562348\_Brevilongium\_globuliferum

Bromheadia:

ITS: KM921777\_Bromheadia\_findlaysoniana  
matK: GQ145085\_Bromheadia\_findlaysoniana  
rbcL: FN870778\_Bromheadia\_srilankensis  
trnLF: KM921779\_Bromheadia\_findlaysoniana  
xdh: KM921778\_Bromheadia\_findlaysoniana

Broughtonia negrilensis:

ITS: AY008569\_Broughtonia\_negrilensis  
matK: AY396093\_Broughtonia\_negrilensis  
trnLF: AY422396\_Broughtonia\_negrilensis

Bulbophyllum:

ITS: AF521074\_Bulbophyllum\_lobbii  
matK: AY121740\_Bulbophyllum\_lobbii  
psaB: AY380944\_Bulbophyllum\_lobbii  
rbcL: AF074115\_Bulbophyllum\_lobbii  
trnLF: AF519957\_Bulbophyllum\_lobbii  
xdh: GU004448\_Bulbophyllum\_auriflorum  
ycfla: EU490724\_Bulbophyllum\_scaberulum

Cadetia (Dendrobium):

ITS: AY239948\_Cadetia\_maideniana  
matK: EF079346\_Cadetia\_quinqueloba  
nad1: EF464122\_Cadetia\_quinqueloba  
psaB: AY380945\_Cadetia\_taylori  
rbcL: D58406\_Cadetia\_taylori  
xdh: GU004443\_Cadetia\_quinqueloba

Calanthe:

ITS: AY008467\_Calanthe\_tricarinata  
matK: AF263633\_Calanthe\_tricarinata  
nad1: AF314854\_Calanthe\_vestita  
psaB: AY380947\_Calanthe\_triplicata  
rbcL: AF264160\_Calanthe\_tricarinata  
trnLF: AF519940\_Calanthe\_tricarinata  
xdh: GU004417\_Calanthe\_sylvatica

Calopogon:

ITS: AF273367\_Calopogon\_tuberosus  
matK: AF263635\_Calopogon\_tuberosus  
psaB: AY380949\_Calopogon\_pallidus  
rbcL: AF264161\_Calopogon\_tuberosus  
trnLF: AF519913\_Calopogon\_oklahomensis

Calypso:

ITS: AF521076\_Calypso\_bulbosa  
matK: EF525689\_Calypso\_bulbosa  
nad1: AF314855\_Calypso\_bulbosa  
psaB: AY380950\_Calypso\_bulbosa  
rbcL: AF264162\_Calypso\_bulbosa  
trnLF: AF519960\_Calypso\_bulbosa  
xdh: GU004426\_Calypso\_bulbosa

Calyptrochilum\_christyan:

ITS: DQ091668\_Calyptrochilum\_christyanum  
matK: DQ091325\_Calyptrochilum\_christyanum  
trnLF: DQ091449\_Calyptrochilum\_christyanum

Campylocentrum:

ITS: AF506295\_Campylocentrum\_fasciola  
matK: AF506343\_Campylocentrum\_fasciola  
trnLF: AY147226\_Campylocentrum\_fasciola  
xdh: GU004416\_Campylocentrum\_schiedei  
ycfla: EU490725\_Campylocentrum\_micranthum

Capanemia:

matK: FJ563840\_Capanemia\_superflua  
psaB: FJ534262\_Capanemia\_superflua  
rbcL: FJ534139\_Capanemia\_superflua  
trnLF: AF350707\_Capanemia\_superflua  
ycfla: FJ563152\_Capanemia\_superflua  
ycflb: FJ562457\_Capanemia\_superflua

Catasetum:

ITS: EU877155\_Catasetum\_luridum  
matK: AF263637\_Catasetum\_expansum  
nad1: AF314856\_Catasetum\_expansum  
psaB: AY380951\_Catasetum\_sp\_  
rbcL: AF074121\_Catasetum\_expansum  
xdh: GU004392\_Catasetum\_aff.  
ycfla: JF692067\_Catasetum\_sp.

Cattleya:

ITS: AF260210\_Cattleya\_dowiana  
matK: AF263638\_Cattleya\_dowiana  
nad1: AF314857\_Cattleya\_dowiana  
psaB: AY380952\_Cattleya\_percivaliana  
rbcL: AF074122\_Cattleya\_dowiana  
trnLF: AY422403\_Cattleya\_dowiana  
xdh: GU004452\_Cattleya\_velutina



Caucaea\_phalaenopsis:

ITS: AF432950\_Caucaea\_phalaenopsis  
matK: AF433006\_Caucaea\_phalaenopsis  
psaB: FJ534343\_Caucaea\_phalaenopsis  
rbcL: FJ534221\_Caucaea\_phalaenopsis  
trnLF: AF433025\_Caucaea\_phalaenopsis  
ycfla: FJ563677\_Caucaea\_phalaenopsis  
ycflb: FJ562455\_Caucaea\_phalaenopsis

Cephalanthera:

ITS: AF521060\_Cephalanthera\_damasonium  
matK: AY368396\_Cephalanthera\_damasonium  
nad1: AF314858\_Cephalanthera\_damasonium  
psaB: AY380953\_Cephalanthera\_longifolia  
rbcL: AF074123\_Cephalanthera\_damasonium  
trnLF: AJ409381\_Cephalanthera\_damasonium

Ceratostylis:

matK: AY368397\_Ceratostylis\_rubra  
rbcL: AY368353\_Ceratostylis\_rubra  
ycfla: EU490726\_Ceratostylis\_incognita

Chamaeangis\_odor:

ITS: DQ091617\_Chamaeangis\_odoratissima  
matK: DQ091374\_Chamaeangis\_odoratissima  
trnLF: DQ091499\_Chamaeangis\_odoratissima

Chaubardia:

ITS: AY870072\_Chaubardia\_klugii  
matK: AY869973\_Chaubardia\_klugii  
nad1: AF314913\_Chaubardia\_heteroclita  
trnLF: AY869885\_Chaubardia\_klugii

Chaubardiella\_pacuar:

ITS: AY870046\_Chaubardiella\_pacuarensis  
matK: AY869947\_Chaubardiella\_pacuarensis  
trnLF: AY869859\_Chaubardiella\_pacuarensis

Chondrorhyncha:

ITS: AY870015\_Chondrorhyncha\_aff\_hirtzii  
matK: AF239421\_Chondrorhyncha\_reichenbachiana  
rbcL: AY368354\_Chondrorhyncha\_sp\_  
trnLF: AF239517\_Chondrorhyncha\_reichenbachiana  
ycfla: JF692062\_Chondrorhyncha\_sp.

Chondroscaphe\_amabilis:

ITS: AY870065\_Chondroscaphe\_amabilis  
matK: AY869966\_Chondroscaphe\_amabilis  
trnLF: AY869878\_Chondroscaphe\_amabilis

Christensonia (Vanda) vietnamica:

ITS: DQ091676\_Christensonia\_vietnamica  
matK: EF079272\_Christensonia\_vietnamica

nad1: EF464126\_Christensonia\_vietnamica  
trnLF: EF670413\_Christensonia\_vietnamica

*Chysis\_bractescens*:

ITS: EF079363\_Chysis\_bractescens  
matK: AY121747\_Chysis\_bractescens  
nad1: AF314859\_Chysis\_bractescens  
psaB: AY380956\_Chysis\_bractescens  
rbcL: AF074126\_Chysis\_bractescens  
trnLF: AF266971\_Chysis\_bractescens  
xdh: GU004457\_Chysis\_bractescens

*Chytroglossa\_marileoniae*:

ITS: DQ315817\_Chytroglossa\_marileoniae  
matK: FJ565112\_Chytroglossa\_marileoniae  
psaB: FJ534366\_Chytroglossa\_marileoniae  
rbcL: FJ534244\_Chytroglossa\_marileoniae  
trnLF: FJ562408\_Chytroglossa\_marileoniae  
ycfla: FJ563781\_Chytroglossa\_marileoniae  
ycflb: FJ563066\_Chytroglossa\_marileoniae

*Cirrhaea\_dependens*:

ITS: AF239381\_Cirrhaea\_dependens  
matK: AF239477\_Cirrhaea\_dependens  
trnLF: AF239573\_Cirrhaea\_dependens

*Cischweinfia\_dasyandra*:

ITS: AF350527\_Cischweinfia\_dasyandra  
matK: AF239498\_Cischweinfia\_dasyandra  
psaB: FJ534370\_Cischweinfia\_dasyandra  
rbcL: FJ534248\_Cischweinfia\_dasyandra  
trnLF: AF350685\_Cischweinfia\_dasyandra  
ycfla: FJ563271\_Cischweinfia\_dasyandra  
ycflb: FJ563078\_Cischweinfia\_dasyandra

*Cleisostoma*:

matK: AB217722\_Cleisostoma\_scolopendrifolium  
psaB: AY380963\_Cleisostoma\_arietinum  
rbcL: AF074130\_Cleisostoma\_rolfeanum

*Cochleanthes\_aromatica*:

ITS: AY870063\_Cochleanthes\_aromatica  
matK: AY869964\_Cochleanthes\_aromatica  
trnLF: AY869876\_Cochleanthes\_aromatica

*Cochlioda (Oncidium) noezliana*:

ITS: AF350743\_Cochlioda\_noezliana  
matK: EF079211\_Cochlioda\_noezliana  
trnLF: AF350728\_Cochlioda\_noezliana

*Coelia*:

ITS: EF079362\_Coelia\_triptera  
matK: AF263643\_Coelia\_triptera  
nad1: AF314860\_Coelia\_triptera

psaB: AY380966\_Coelia\_bella  
rbcL: AF074132\_Coelia\_triptera  
trnLF: AF266972\_Coelia\_triptera  
xdh: GU004458\_Coelia\_triptera

Coeliopsis\_hyacinthosma:  
ITS: AF239344\_Coeliopsis\_hyacinthosma  
matK: EF065564\_Coeliopsis\_hyacinthosma  
nad1: EF464125\_Coeliopsis\_hyacinthosma  
trnLF: AF239536\_Coeliopsis\_hyacinthosma

Coelogyne\_cristata:  
ITS: AF302742\_Coelogyne\_cristata  
matK: AF263644\_Coelogyne\_cristata  
nad1: AF314861\_Coelogyne\_cristata  
psaB: AY380967\_Coelogyne\_cristata  
rbcL: AY149361\_Coelogyne\_cristata  
trnLF: AF519937\_Coelogyne\_cristata  
xdh: GU004433\_Coelogyne\_cristata

Collabium:  
ITS: AF521052\_Collabium\_sp  
matK: AY557200\_Collabium\_simplex  
rbcL: AF264163\_Collabium\_sp  
trnLF: EF670434\_Collabium\_simplex  
xdh: GU004404\_Collabium\_nebulosum

Comparettia:  
ITS: AF350541\_Comparettia\_macroplectron  
matK: FJ565090\_Comparettia\_falcata  
psaB: FJ534359\_Comparettia\_falcata  
rbcL: FJ534237\_Comparettia\_falcata  
trnLF: FJ562403\_Comparettia\_falcata  
ycfla: FJ563757\_Comparettia\_falcata  
ycflb: FJ563043\_Comparettia\_falcata

Condylago\_rodrigoii:  
ITS: AF262829\_Condylago\_rodrigoii  
matK: AF265460\_Condylago\_rodrigoii  
trnLF: AF265516\_Condylago\_rodrigoii

Constantia:  
ITS: AY008499\_Constantia\_microscopica  
matK: AF263796\_Constantia\_cipoensis  
trnLF: AF267023\_Constantia\_cipoensis

Corallorhiza:  
ITS: EF525685\_Corallorhiza\_wisteriana  
matK: KM598435\_Corallorhiza\_wisteriana  
rbcL: EU391361\_Corallorhiza\_wisteriana  
xdh: GU004436\_Corallorhiza\_maculata

Coryanthes:  
ITS: AF239360\_Coryanthes\_elegantium

matK: AF239456\_Coryanthes\_elegantium  
psaB: AY380969\_Coryanthes\_mastersiana  
rbcL: AF074134\_Coryanthes\_verrucolineata  
trnLF: AF239552\_Coryanthes\_elegantium  
ycfla: JF692064\_Coryanthes\_sp.

Corymborkis:

ITS: KM598424\_Corymborkis\_sp.  
matK: AF263647\_Corymborkis\_sp.  
psaB: AY380972\_Corymborkis\_veratrifolia  
rbcL: AF074136\_Corymborkis\_sp  
xdh: GU004478\_Corymborkis\_corymbis

Cremastra\_app:

ITS: EF525673\_Cremastra\_appendiculata  
matK: KM598436\_Cremastra\_appendiculata  
rbcL: EU391354\_Cremastra\_appendiculata  
trnLF: EU266439\_Cremastra\_appendiculata\_var\_variabilis

Cribbia\_confusa:

ITS: DQ091578\_Cribbia\_confusa  
matK: DQ091366\_Cribbia\_confusa  
trnLF: DQ091491\_Cribbia\_confusa

Cryptarrhena:

ITS: AF239324\_Cryptarrhena\_lunata  
matK: AF239420\_Cryptarrhena\_lunata  
nad1: AF314862\_Cryptarrhena\_sp.  
psaB: AY380974\_Cryptarrhena\_lunata  
rbcL: AF074138\_Cryptarrhena\_sp  
trnLF: AY869894\_Cryptarrhena\_lunata  
ycfla: EU123733\_Cryptarrhena\_lunata

Cryptocentrum:

ITS: DQ210279\_Cryptocentrum\_peruvianum  
matK: DQ210786\_Cryptocentrum\_peruvianum  
nad1: AF314863\_Cryptocentrum\_peruvianum  
psaB: AY380975\_Cryptocentrum\_sp.  
rbcL: AF074139\_Cryptocentrum\_peruvianum  
trnLF: AF239522\_Cryptocentrum\_calcaratum

Cryptopus:

ITS: DQ091585\_Cryptopus\_elatus  
matK: DQ091326\_Cryptopus\_elatus  
trnLF: DQ091450\_Cryptopus\_elatus  
ycfla: EU490728\_Cryptopus\_paniculatus

Cuitlauzina\_candida:

ITS: EF079417\_Cuitlauzina\_candida  
matK: EF079217\_Cuitlauzina\_candida  
psaB: FJ534374\_Cuitlauzina\_candida  
rbcL: FJ534253\_Cuitlauzina\_candida  
trnLF: FJ562416\_Cuitlauzina\_candida  
ycfla: FJ563817\_Cuitlauzina\_candida

ycflb: FJ562519\_Cuitlauzina\_candida

Cycnoches:

ITS: KM598425\_Cycnoches\_egertonianum  
matK: AY368401\_Cycnoches\_egertonianum  
nad1: AF314864\_Cycnoches\_egertonianum  
rbcL: AY368355\_Cycnoches\_egertonianum  
ycfla: JF692125\_Cycnoches\_sp.

Cymbidium:

ITS: AF470503\_Cymbidium\_eburneum  
matK: AF470470\_Cymbidium\_eburneum  
nad1: AF314866\_Cymbidium\_giganteum  
psaB: AY380978\_Cymbidium\_goeringii  
rbcL: AY368356\_Cymbidium\_eburneum  
xdh: GU004389\_Cymbidium\_tigrinum

Cypripedium:

ITS: EF370092\_Cypripedium\_candidum  
xdh: GU004509\_Cypripedium\_tibeticum

Cyrtochiloides\_ochmat:

ITS: AF432946\_Cyrtochiloides\_ochmatochila  
matK: AF433009\_Cyrtochiloides\_ochmatochila  
psaB: FJ534273\_Cyrtochiloides\_ochmatochila  
rbcL: FJ534150\_Cyrtochiloides\_ochmatochila  
trnLF: AF433028\_Cyrtochiloides\_ochmatochila  
ycfla: FJ563195\_Cyrtochiloides\_ochmatochila  
ycflb: FJ562503\_Cyrtochiloides\_ochmatochila

Cyrtochilum\_myanthum:

ITS: AF350848\_Cyrtochilum\_myanthum  
matK: FJ564969\_Cyrtochilum\_myanthum  
psaB: FJ534331\_Cyrtochilum\_myanthum  
rbcL: FJ534209\_Cyrtochilum\_myanthum  
trnLF: FJ562386\_Cyrtochilum\_myanthum  
ycfla: FJ563634\_Cyrtochilum\_myanthum  
ycflb: FJ562922\_Cyrtochilum\_myanthum

Cyrtopodium:

ITS: AF239412\_Cyrtopodium\_punctatum  
matK: AF239508\_Cyrtopodium\_punctatum  
nad1: AF314867\_Cyrtopodium\_andersonii  
psaB: AY380981\_Cyrtopodium\_andersonii  
rbcL: AF074144\_Cyrtopodium\_punctatum  
trnLF: AF239604\_Cyrtopodium\_punctatum  
xdh: GU004395\_Cyrtopodium\_paranaense

Cyrtorchis\_arcuata:

ITS: DQ091624\_Cyrtorchis\_arcuata  
matK: DQ091380\_Cyrtorchis\_arcuata  
trnLF: DQ091505\_Cyrtorchis\_arcuata

Dactylostaalix:

ITS: KM598423\_Dactylostaalix\_ringens  
matK: KM598437\_Dactylostaalix\_ringens

Daiotyla:

ITS: AY870017\_Daiotyla\_crassa  
matK: AY869918\_Daiotyla\_crassa  
trnLF: AY869832\_Daiotyla\_crassa  
ycfla: EU123734\_Daiotyla\_albicans

Dendrobium:

ITS: AF363023\_Dendrobium\_crystallinum  
matK: AF445447\_Dendrobium\_crystallinum  
nad1: AY441767\_Dendrobium\_crystallinum  
psaB: AY380983\_Dendrobium\_kingianum  
rbcL: D58407\_Dendrobium\_crystallinum  
trnLF: EF397917\_Dendrobium\_crystallinum  
xdh: GU004440\_Dendrobium\_macrophyllum

Dendrochilum:

ITS: AF461465\_Dendrochilum\_glumaceum  
matK: AF302696\_Dendrochilum\_glumaceum  
psaB: AY380984\_Dendrochilum\_cobbianum  
rbcL: AF264164\_Dendrochilum\_glumaceum  
trnLF: AF519933\_Dendrochilum\_glumaceum  
xdh: GU004422\_Dendrochilum\_wenzelii

Diaphananthe:

ITS: DQ091619\_Diaphananthe\_lorifolia  
matK: DQ091376\_Diaphananthe\_lorifolia  
psaB: AY380985\_Diaphananthe\_rutila  
rbcL: AF074147\_Diaphananthe\_rutila  
trnLF: DQ091501\_Diaphananthe\_lorifolia

Diceratostele:

ITS: KM598426\_Diceratostele\_gabonensis  
rbcL: AF074148\_Diceratostele\_gabonensis

Dichaea:

ITS: EU123594\_Dichaea\_riopalenquensis  
matK: EU123657\_Dichaea\_riopalenquensis  
psaB: AY380986\_Dichaea\_sp  
rbcL: AF074149\_Dichaea\_riopalenquensis  
trnLF: EU123716\_Dichaea\_riopalenquensis  
ycfla: EU123778\_Dichaea\_riopalenquensis

Dilochia:

ITS: AF461462\_Dilochia\_sp  
matK: AF263653\_Dilochia\_sp  
rbcL: AF264165\_Dilochia\_sp  
trnLF: AF519932\_Dilochia\_sp

Dilomilis\_montana:

ITS: AF260147\_Dilomilis\_montana

matK: AY368404\_Dilomilis\_montana  
nad1: AF314868\_Dilomilis\_montana  
psaB: AY380987\_Dilomilis\_montana  
rbcL: AF074150\_Dilomilis\_montana  
trnLF: AF266967\_Dilomilis\_montana

Dimerandra\_emarginata:

ITS: AF260179\_Dimerandra\_emarginata  
matK: AF263784\_Dimerandra\_emarginata  
trnLF: AY422446\_Dimerandra\_emarginata

Dinema\_polybulbon:

ITS: AY429399\_Dinema\_polybulbon  
matK: AF263769\_Dinema\_polybulbon  
rbcL: AF518061\_Dinema\_polybulbon  
trnLF: AY422412\_Dinema\_polybulbon

Diplocaulobium (Dendrobium):

ITS: AY240007\_Diplocaulobium\_ischnopetalum  
matK: EF079344\_Diplocaulobium\_aureicolor  
rbcL: D58409\_Diplocaulobium\_arachnoideum  
xdh: GU004447\_Diplocaulobium\_aureicolor

Dipodium:

matK: EF079261\_Dipodium\_paludosum  
xdh: GU004400\_Dipodium\_sp.

Dipteranthus (Zygostates) grandiflorus:

ITS: AF350508\_Dipteranthus\_grandiflorus  
matK: AF350587\_Dipteranthus\_grandiflorus  
nad1: AF314869\_Dipteranthus\_grandiflorus  
rbcL: AY368357\_Dipteranthus\_grandiflorus  
trnLF: AF350666\_Dipteranthus\_grandiflorus

Domingoa\_nodosa:

ITS: AY008565\_Domingoa\_nodosa  
matK: AY425794\_Domingoa\_nodosa  
trnLF: AY422445\_Domingoa\_nodosa

Dracula\_chimera:

ITS: EF372358\_Dracula\_chimaera  
matK: AF265444\_Dracula\_chimaera  
rbcL: AF518039\_Dracula\_chimaera  
trnLF: AF265489\_Dracula\_chimaera

Dresslerella\_elvallensis:

ITS: AF262901\_Dresslerella\_elvallensis  
matK: AF265477\_Dresslerella\_elvallensis  
trnLF: AF265521\_Dresslerella\_elvallensis

Dressleria:

ITS: AF239411\_Dressleria\_dilecta  
matK: AF239507\_Dressleria\_dilecta  
nad1: EF464113\_Dressleria\_dilecta

psaB: AY380991\_Dressleria\_eburnea  
rbcL: AF074153\_Dressleria\_eburnea  
trnLF: AF239603\_Dressleria\_dilecta  
xdh: GU004391\_Dressleria\_dilecta  
ycfla: EU490731\_Dressleria\_dilecta

Dryadella:

ITS: AF262824\_Dryadella\_edwallii  
matK: AF265454\_Dryadella\_edwallii  
trnLF: AF265505\_Dryadella\_edwallii  
xdh: GU004456\_Dryadella\_hirtzii

Earina:

ITS: AY008469\_Earina\_autumnalis  
matK: AF263656\_Earina\_autumnalis  
nad1: AF314870\_Earina\_autumnalis  
psaB: AY380993\_Earina\_deplanchei  
rbcL: AF074155\_Earina\_autumnalis  
trnLF: AY008448\_Earina\_valida  
xdh: GU004429\_Earina\_autumnalis

Echinorhyncha\_litensis:

ITS: AY870039\_Echinorhyncha\_litensis  
matK: AY869940\_Echinorhyncha\_litensis  
trnLF: AY869852\_Echinorhyncha\_litensis

Eleorchis\_japonica:

ITS: AF521055\_Eleorchis\_japonica  
matK: AF263657\_Eleorchis\_japonica  
rbcL: AF264166\_Eleorchis\_japonica  
trnLF: AF519914\_Eleorchis\_japonica

Elleanthus:

ITS: EU490668\_Elleanthus\_oliganthus  
matK: EU490688\_Elleanthus\_oliganthus  
nad1: EF464154\_Elleanthus\_caravata  
psaB: AY380994\_Elleanthus\_caravata  
rbcL: AF074156\_Elleanthus\_sp  
trnLF: KM669159\_Elleanthus\_lancifolius  
xdh: GU004463\_Elleanthus\_sp.  
ycfla: EU490738\_Elleanthus\_oliganthus

Eloyella\_thienii:

ITS: DQ315820\_Eloyella\_thienii  
matK: DQ315888\_Eloyella\_thienii  
psaB: FJ534327\_Eloyella\_thienii  
rbcL: FJ534205\_Eloyella\_thienii  
trnLF: DQ315916\_Eloyella\_thienii  
ycfla: FJ563615\_Eloyella\_thienii  
ycflb: FJ562903\_Eloyella\_thienii

Embreea\_rodigasiana:

ITS: AF239358\_Embreea\_rodigasiana  
matK: AF239454\_Embreea\_rodigasiana



trnLF: AF239550\_Embreea\_rodigasiana

Encyclia:

ITS: AF260184\_Encyclia\_oncidioides  
matK: AF263788\_Encyclia\_oncidioides  
psaB: AY380995\_Encyclia\_cochleata  
rbcL: AF518062\_Encyclia\_oncidioides  
trnLF: AF267013\_Encyclia\_oncidioides  
xdh: GU004453\_Encyclia\_granitica  
ycfla: EU490741\_Encyclia\_guatemalensis

Entomophobia:

ITS: AF302732\_Entomophobia\_kinabaluensis  
matK: AY121733\_Entomophobia\_kinabaluensis  
rbcL: AF518036\_Entomophobia\_kinabaluensis  
trnLF: AF519938\_Entomophobia\_kinabaluensis

Epidendrum:

ITS: AF260174\_Epidendrum\_campestre  
matK: AF263781\_Epidendrum\_campestre  
nad1: EF464107\_Epidendrum\_rigidum  
psaB: AY380996\_Epidendrum\_ciliare  
rbcL: AF518060\_Epidendrum\_campestre  
trnLF: AF267002\_Epidendrum\_campestre  
xdh: GU004451\_Epidendrum\_nocturnum

Epipactis:

ITS: AF521059\_Epipactis\_helleborine  
matK: EU490692\_Epipactis\_helleborine  
nad1: AF314872\_Epipactis\_helleborine  
psaB: AY380998\_Epipactis\_helleborine  
rbcL: Z73707\_Epipactis\_helleborine  
trnLF: AJ409408\_Epipactis\_helleborine  
xdh: GU004476\_Epipactis\_purpurata  
ycfla: EU490742\_Epipactis\_helleborine

Eria:

ITS: AF521071\_Eria\_ferruginea  
matK: AF263660\_Eria\_ferruginea  
nad1: AF314873\_Eria\_ferruginea  
psaB: AY381004\_Eria\_javanica  
rbcL: AF074164\_Eria\_ferruginea  
trnLF: AF519954\_Eria\_ferruginea  
xdh: GU004421\_Eria\_javanica

Eriopsis:

ITS: AF239409\_Eriopsis\_rutidobulbon  
matK: AY368407\_Eriopsis\_rutidobulbon  
nad1: AF314874\_Eriopsis\_rutidobulbon  
psaB: AY381007\_Eriopsis\_biloba  
rbcL: AF074167\_Eriopsis\_biloba  
trnLF: AF239602\_Eriopsis\_rutidobulbon  
ycfla: EU490743\_Eriopsis\_biloba  
ycflb: FJ562869\_Eriopsis\_biloba

*Erycina\_hyalinobulbon*:

ITS: AF350536\_*Erycina\_hyalinobulbon*  
matK: AF350615\_*Erycina\_hyalinobulbon*  
psaB: FJ534266\_*Erycina\_hyalinobulbon*  
rbcL: FJ534143\_*Erycina\_hyalinobulbon*  
trnLF: AF350694\_*Erycina\_hyalinobulbon*  
ycfla: EU490744\_*Erycina\_hyalinobulbon*  
ycflb: FJ562873\_*Erycina\_hyalinobulbon*

*Euchile (Prosthechea) citrina*:

ITS: AY008501\_*Euchile\_citrina*  
matK: AY396106\_*Euchile\_citrina*  
trnLF: AY422409\_*Euchile\_citrina*

*Eulophia*:

ITS: AF239413\_*Eulophia\_guineensis*  
matK: AF239509\_*Eulophia\_guineensis*  
nad1: EF464117\_*Eulophia\_streptopetala*  
psaB: AY381010\_*Eulophia\_petersii*  
rbcL: AM235039\_*Eulophia\_streptopetala*  
trnLF: AF239605\_*Eulophia\_guineensis*  
ycfla: EU490745\_*Eulophia\_guineensis*  
ycflb: FJ563111\_*Eulophia\_graminea*

*Euryblema\_andreae*:

ITS: AY870047\_*Euryblema\_andreae*  
matK: AY869948\_*Euryblema\_andreae*  
nad1: EF464110\_*Euryblema\_andreae*  
trnLF: AY869860\_*Euryblema\_andreae*

*Eurychone\_rothschild*:

ITS: DQ091615\_*Eurychone\_rothschildiana*  
matK: DQ091350\_*Eurychone\_rothschildiana*  
trnLF: DQ091474\_*Eurychone\_rothschildiana*

*Fernandezia\_ionanthera*:

ITS: AF239390\_*Fernandezia\_ionanthera*  
matK: AF239486\_*Fernandezia\_ionanthera*  
psaB: FJ534341\_*Fernandezia\_ionanthera*  
rbcL: FJ534219\_*Fernandezia\_ionanthera*  
trnLF: AF239582\_*Fernandezia\_ionanthera*  
ycfla: FJ563675\_*Fernandezia\_ionanthera*  
ycflb: FJ562964\_*Fernandezia\_ionanthera*

*Galeottia\_fimbriata*:

ITS: AY870091\_*Galeottia\_fimbriata*  
matK: AY869992\_*Galeottia\_fimbriata*  
trnLF: AY869896\_*Galeottia\_fimbriata*

*Glomera*:

ITS: AF521078\_*Glomera\_sp*  
matK: AY121742\_*Glomera\_sp*  
psaB: AY381013\_*Glomera\_macdonaldii*

rbcL: AF074172\_Glomera\_sp  
trnLF: AF519962\_Glomera\_sp  
xdh: GU004438\_Glomera\_sp.

Gomesa\_planifolia:

ITS: AF350554\_Gomesa\_planifolia  
matK: AF350633\_Gomesa\_planifolia  
psaB: FJ534265\_Gomesa\_planifolia  
rbcL: FJ534142\_Gomesa\_planifolia  
trnLF: AF350712\_Gomesa\_planifolia  
ycfla: FJ563159\_Gomesa\_planifolia  
ycflb: FJ562464\_Gomesa\_planifolia

Gongora:

ITS: AF239385\_Gongora\_amparoana  
matK: AY368409\_Gongora\_amparoana  
nad1: AF314878\_Gongora\_amparoana  
rbcL: AY368358\_Gongora\_amparoana  
trnLF: AF239577\_Gongora\_amparoana  
ycfla: JF692065\_Gongora\_sp.

Govenia:

ITS: EF525672\_Govenia\_sp  
matK: AF263664\_Govenia\_sp.  
nad1: AF314879\_Govenia\_sp.  
psaB: AY381017\_Govenia\_superba  
rbcL: AF074175\_Govenia\_sp  
trnLF: AF519916\_Govenia\_liliacea  
xdh: GU004437\_Govenia\_viaria  
ycfla: EU490747\_Govenia\_sodiroi

Grammatophyllum:

ITS: AF470488\_Grammatophyllum\_speciosum  
matK: AF470458\_Grammatophyllum\_speciosum  
psaB: AY381018\_Grammatophyllum\_scriptum  
rbcL: AF074176\_Grammatophyllum\_speciosum  
trnLF: AF239606\_Grammatophyllum  
xdh: GU004399\_Grammatophyllum\_speciosum

Grandiphyllum\_auriculum:

matK: FJ564947\_Grandiphyllum\_auriculum  
psaB: FJ534322\_Grandiphyllum\_auriculum  
rbcL: FJ534200\_Grandiphyllum\_auriculum  
trnLF: FJ562382\_Grandiphyllum\_auriculum  
ycfla: FJ563823\_Grandiphyllum\_auriculum  
ycflb: FJ563107\_Grandiphyllum\_auriculum

Graphorkis:

matK: AY368410\_Graphorkis\_lurida  
rbcL: AY368359\_Graphorkis\_lurida  
xdh: GU004390\_Graphorkis\_concolor

Hagsatera\_brachycolumna:

ITS: AY008515\_Hagsatera\_brachycolumna

matK: AY396088\_Hagsatera\_brachycolumna  
trnLF: AY422391\_Hagsatera\_brachycolumna

Harrisella (Dendrophylax) porrecta:  
ITS: AF506315\_Harrisella\_porrecta  
matK: AF506357\_Harrisella\_porrecta  
trnLF: AF506335\_Harrisella\_porrecta

Helcia (Trichopilia) brevis:  
matK: EF079229\_Helcia\_brevis  
nad1: EF464115\_Helcia\_brevis  
psaB: FJ534271\_Helcia\_brevis  
rbcL: FJ534148\_Helcia\_brevis  
ycfla: FJ563182\_Helcia\_brevis  
ycflb: FJ562490\_Helcia\_brevis

Helleriella\_guerr:  
matK: AF263761\_Helleriella\_guerrerenensis  
rbcL: AF518029\_Helleriella\_guerrerenensis  
trnLF: AF266961\_Helleriella\_guerrerenensis

Hexadesmia (Scaphyglottis):  
ITS: AF260180\_Hexadesmia\_sp.  
matK: AY368411\_Hexadesmia\_sp.  
nad1: AF314881\_Hexadesmia\_sp.  
rbcL: AY368360\_Hexadesmia\_sp.  
trnLF: AY422388\_Hexadesmia\_crurigera

Hexalectris:  
ITS: AY008479\_Hexalectris\_revoluta  
matK: AF263665\_Hexalectris\_revoluta  
rbcL: AF264168\_Hexalectris\_revoluta  
trnLF: AF519908\_Hexalectris\_revoluta

Hintonella\_mexicana:  
ITS: DQ315822\_Hintonella\_mexicana  
matK: DQ315890\_Hintonella\_mexicana  
psaB: FJ534317\_Hintonella\_mexicana  
rbcL: FJ534195\_Hintonella\_mexicana  
trnLF: FJ562378\_Hintonella\_mexicana  
ycfla: FJ563583\_Hintonella\_mexicana  
ycflb: FJ562874\_Hintonella\_mexicana

Hofmeisterella\_eumicro:  
ITS: DQ315823\_Hofmeisterella\_eumicroscopica  
matK: FJ565091\_Hofmeisterella\_eumicroscopica  
psaB: FJ534360\_Hofmeisterella\_eumicroscopica  
rbcL: FJ534238\_Hofmeisterella\_eumicroscopica  
trnLF: DQ315919\_Hofmeisterella\_eumicroscopica  
ycfla: FJ563193\_Hofmeisterella\_eumicroscopica  
ycflb: FJ563044\_Hofmeisterella\_eumicroscopica

Hirtzia (Pterostemma) benzingii:  
matK: FJ565102\_Hirtzia\_benzingii

psaB: FJ534364\_Hirtzia\_benzingii  
rbcL: FJ534242\_Hirtzia\_benzingii  
ycfla: FJ563770\_Hirtzia\_benzingii  
ycflb: FJ563055\_Hirtzia\_benzingii

Holcoglossum\_kimballianum:  
ITS: EF079436\_Holcoglossum\_kimballianum  
matK: EF655783\_Holcoglossum\_kimballianum  
rbcL: HQ404490\_Holcoglossum\_kimballianum  
trnLF: EF670419\_Holcoglossum\_kimballianum

Homalopetalum\_pumilio:  
ITS: AY429389\_Homalopetalum\_pumilio  
matK: AY396089\_Homalopetalum\_pumilio  
trnLF: AY422392\_Homalopetalum\_pumilio

Houletia:  
ITS: AF239371\_Houletia\_sanderi  
matK: AF239467\_Houletia\_sanderi  
psaB: AY381020\_Houletia\_sanderi  
rbcL: AF074178\_Houletia\_sanderi  
trnLF: AF239563\_Houletia\_sanderi  
xdh: GU004397\_Houletia\_clarae

Huntleya:  
ITS: AY870075\_Huntleya\_wallisii  
matK: AY869975\_Huntleya\_wallisii  
psaB: AY381021\_Huntleya\_heteroclita  
rbcL: AF074179\_Huntleya\_heteroclita  
trnLF: AY869888\_Huntleya\_wallisii  
ycfla: EU123796\_Huntleya\_wallisii

Ionopsis\_minutiflora:  
ITS: AF350548\_Ionopsis\_minutiflora  
matK: AF350627\_Ionopsis\_minutiflora  
psaB: FJ534326\_Ionopsis\_minutiflora  
rbcL: FJ534204\_Ionopsis\_minutiflora  
trnLF: AF350706\_Ionopsis\_minutiflora  
ycfla: FJ563611\_Ionopsis\_minutiflora  
ycflb: FJ563001\_Ionopsis\_minutiflora

Isabelia\_virginalis:  
ITS: EF079375\_Isabelia\_virginalis  
matK: EF079320\_Isabelia\_virginalis  
trnLF: AF266987\_Isabelia\_virginalis

Isochilus:  
ITS: AF260143\_Isochilus\_amparoanus  
matK: AF263762\_Isochilus\_amparoanus  
nad1: AF314882\_Isochilus\_amparoanus  
rbcL: AY368361\_Isochilus\_amparoanus  
trnLF: AF266962\_Isochilus\_amparoanus  
xdh: GU004459\_Isochilus\_linearis  
ycfla: EU490749\_Isochilus\_major

*Ixyophora\_viridisepala*:

ITS: AY870042\_Ixyophora\_viridisepala  
matK: AY869942\_Ixyophora\_viridisepala  
trnLF: AY869855\_Ixyophora\_viridisepala

*Jacquiniella\_teretifolia*:

ITS: AY008519\_Jacquiniella\_teretifolia  
matK: AY396087\_Jacquiniella\_teretifolia  
trnLF: AY422390\_Jacquiniella\_teretifolia

*Jumellea*:

matK: DQ091428\_Jumellea\_confusa  
nad1: EF464101\_Jumellea\_sp.  
trnLF: DQ091553\_Jumellea\_confusa

*Kefersteinia*:

ITS: AY870038\_Kefersteinia\_expansa  
matK: AY869939\_Kefersteinia\_expansa  
trnLF: AY869851\_Kefersteinia\_expansa  
ycfla: JF692069\_Kefersteinia\_sp.

*Kegeliella*:

ITS: AF239364\_Kegeliella\_kupperi  
matK: AF263666\_Kegeliella\_kupperi  
nad1: EF464111\_Kegeliella\_atropilosa  
psaB: AY381024\_Kegeliella\_atropilosa  
rbcL: AF074181\_Kegeliella\_kupperi  
trnLF: AF239556\_Kegeliella\_kupperi

*Koellensteinia\_graminea*:

ITS: AY870102\_Koellensteinia\_graminea  
matK: AY870003\_Koellensteinia\_graminea  
rbcL: AF074182\_Koellensteinia\_graminea  
trnLF: AY869906\_Koellensteinia\_graminea

*Laelia*:

ITS: AY008578\_Laelia\_speciosa  
matK: AF263792\_Laelia\_speciosa  
nad1: EF464108\_Laelia\_gouldiana  
rbcL: AF518070\_Laelia\_speciosa  
trnLF: AF267018\_Laelia\_speciosa

*Laeliopsis (Broughtonia) domingensis*:

ITS: AF260187\_Laeliopsis\_domingensis  
matK: AF263791\_Laeliopsis\_domingensis  
trnLF: AY422448\_Laeliopsis\_domingensis

*Lanium (Epidendrum) avicula*:

ITS: AF260169\_Lanium\_aviculum  
matK: AF263778\_Lanium\_avicula  
trnLF: AF266998\_Lanium\_avicula

*Lemurella\_pallidiflora*:

ITS: DQ091591\_Lemurella\_pallidiflora  
matK: DQ091330\_Lemurella\_pallidiflora  
trnLF: DQ091454\_Lemurella\_pallidiflora

Leochilus:

ITS: EF079400\_Leochilus\_carinatus  
matK: EF079194\_Leochilus\_carinatus  
psaB: FJ534260\_Leochilus\_carinatus  
rbcL: FJ534138\_Leochilus\_carinatus  
trnLF: FJ562352\_Leochilus\_carinatus  
xdh: GU004379\_Leochilus\_oncidioides  
ycfla: FJ563145\_Leochilus\_carinatus  
ycflb: FJ562451\_Leochilus\_carinatus

Lepanthes:

ITS: AF262890\_Lepanthes\_woodburyana  
matK: AF265472\_Lepanthes\_woodburyana  
rbcL: AY368362\_Lepanthes\_peperomioides  
trnLF: AF265494\_Lepanthes\_woodburyana

Leptotes\_bicolor:

ITS: AF260185\_Leptotes\_bicolor  
matK: AF263789\_Leptotes\_bicolor  
nad1: AF314883\_Leptotes\_bicolor  
trnLF: AF267014\_Leptotes\_bicolor

Liparis:

ITS: AB289475\_Liparis\_liliifolia  
matK: AF263667\_Liparis\_lilifolia  
nad1: AF314884\_Liparis\_lilifolia  
psaB: AY381026\_Liparis\_viridiflora  
rbcL: AF074183\_Liparis\_lilifolia  
trnLF: EU017494\_Liparis\_liliifolia  
xdh: GU004450\_Liparis\_loeselii

Listera (Neottia):

ITS: AF521058\_Listera\_smallii  
matK: AF263668\_Listera\_smallii  
nad1: AH010949\_Listera\_smallii  
psaB: AY381027\_Listera\_ovata  
rbcL: AF074184\_Listera\_smallii  
trnLF: AJ409422\_Listera\_smallii  
xdh: GU004473\_Listera\_ovata

Listrostachys\_pertusa:

ITS: DQ091637\_Listrostachys\_pertusa  
matK: DQ091384\_Listrostachys\_pertusa  
trnLF: DQ091509\_Listrostachys\_pertusa

Lockhartia:

ITS: AF350515\_Lockhartia\_amoena  
matK: AF350594\_Lockhartia\_amoena  
nad1: AF314885\_Lockhartia\_amoena  
psaB: FJ534342\_Lockhartia\_bennettii

rbcL: FJ534220\_Lockhartia\_bennettii  
trnLF: AF350673\_Lockhartia\_amoena  
ycfla: FJ563116\_Lockhartia\_amoena  
ycflb: FJ562418\_Lockhartia\_amoena

Luerella\_pelecaniceps:  
ITS: AF262810\_Luerella\_pelecaniceps  
matK: AF265450\_Luerella\_pelecaniceps  
trnLF: AF265512\_Luerella\_pelecaniceps

Luisia:  
ITS: DQ091681\_Luisia\_trichorhiza  
matK: EF655788\_Luisia\_tristis  
trnLF: EF670426\_Luisia\_tristis

Lycaste:  
ITS: AF239342\_Lycaste\_cruenta  
matK: AF239438\_Lycaste\_cruenta  
psaB: AY381028\_Lycaste\_aromatica  
rbcL: AF074185\_Lycaste\_cruenta  
trnLF: AF239534\_Lycaste\_cruenta

Lycomormium:  
ITS: AF239345\_Lycomormium\_fiskei  
matK: AF239441\_Lycomormium\_fiskei  
nad1: AF314886\_Lycomormium\_squalidum  
psaB: AY381029\_Lycomormium\_sp  
rbcL: AF074186\_Lycomormium\_squalidum  
trnLF: AF239537\_Lycomormium\_fiskei

Macradenia\_rubescens:  
matK: FJ564839\_Macradenia\_rubescens  
psaB: FJ534303\_Macradenia\_rubescens  
rbcL: FJ534181\_Macradenia\_rubescens  
trnLF: FJ562370\_Macradenia\_rubescens  
ycfla: FJ563443\_Macradenia\_rubescens  
ycflb: FJ562739\_Macradenia\_rubescens

Macroclinium:  
ITS: AF350550\_Macroclinium\_bicolor  
matK: AF350629\_Macroclinium\_bicolor  
psaB: FJ534313\_Macroclinium\_sp  
rbcL: FJ534191\_Macroclinium\_sp  
trnLF: AF350708\_Macroclinium\_bicolor  
ycfla: FJ563150\_Macroclinium\_bicolor  
ycflb: FJ562456\_Macroclinium\_bicolor

Malaxis:  
ITS: AF521068\_Malaxis\_spicata\_  
matK: AY368415\_Malaxis\_spicata  
nad1: AF314887\_Malaxis\_spicata  
psaB: AY381031\_Malaxis\_spicata  
rbcL: AF074188\_Malaxis\_spicata  
trnLF: AB290902\_Malaxis\_boninensis



xdh: GU004449\_Malaxis\_histionantha

Masdevallia:

ITS: AY008475\_Masdevallia\_floribunda  
matK: AY368416\_Masdevallia\_floribunda  
nad1: AF314888\_Masdevallia\_infracta  
psaB: AY381032\_Masdevallia\_infracta  
rbcL: AF074189\_Masdevallia\_infracta  
trnLF: AF266966\_Masdevallia\_floribunda

Maxillaria:

ITS: DQ210237\_Maxillaria\_cucullata  
matK: DQ210753\_Maxillaria\_cucullata  
nad1: AF314889\_Maxillaria\_cucullata  
psaB: AY381033\_Maxillaria\_nasuta  
rbcL: AF074190\_Maxillaria\_cucullata  
trnLF: EU099777\_Maxillaria\_heterophylla  
xdh: GU004384\_Maxillaria\_parkerii

Meiracyllium\_trinasutum:

ITS: EF079372\_Meiracyllium\_trinasutum  
matK: EF079317\_Meiracyllium\_trinasutum  
nad1: EF464105\_Meiracyllium\_trinasutum  
psaB: AY381037\_Meiracyllium\_trinasutum  
rbcL: AF074192\_Meiracyllium\_trinasutum  
trnLF: AF266973\_Meiracyllium\_trinasutum  
xdh: GU004462\_Meiracyllium\_trinasutum

Mesospinidium (Brassia):

ITS: AF350526\_Mesospinidium\_panamense  
matK: AF239500\_Mesospinidium\_panamense  
psaB: FJ534307\_Mesospinidium\_horichii  
rbcL: FJ534185\_Mesospinidium\_horichii  
trnLF: AF350684\_Mesospinidium\_panamense  
ycfla: FJ563568\_Mesospinidium\_panamense  
ycflb: FJ562859\_Mesospinidium\_panamense

Microcoelia:

ITS: DQ091649\_Microcoelia\_gilpinae  
matK: DQ091397\_Microcoelia\_gilpinae  
trnLF: DQ091522\_Microcoelia\_gilpinae  
ycfla: EU490752\_Microcoelia\_exilis

Microepidendrum\_subul:

ITS: AY429417\_Microepidendrum\_subulatifolium  
matK: AY396138\_Microepidendrum\_subulatifolium  
trnLF: AY422440\_Microepidendrum\_subulatifolium

Miltonia\_regnellii:

ITS: AF239395\_Miltonia\_regnellii  
matK: AF239491\_Miltonia\_regnellii  
psaB: FJ534315\_Miltonia\_regnellii  
rbcL: FJ534193\_Miltonia\_regnellii  
trnLF: AF239587\_Miltonia\_regnellii

ycfla: FJ563571\_Miltonia\_regnellii  
ycflb: FJ562862\_Miltonia\_regnellii

Monophyllorchis:

ITS: KM598427\_Monophyllorchis\_maculata  
matK: EF065603\_Monophyllorchis\_maculata  
nad1: EF464138\_Monophyllorchis\_maculata  
psaB: AY381040\_Monophyllorchis\_maculata  
rbcL: AF074195\_Monophyllorchis\_sp  
trnLF: KM598439\_Monophyllorchis\_sp  
xdh: GU004470\_Monophyllorchis\_sp.

Mormodes:

ITS: KM598430\_Mormodes\_aromatica  
matK: AY368417\_Mormodes\_aromatica  
nad1: AF314891\_Mormodes\_aromatica  
rbcL: AF074196\_Mormodes\_sp

Mormolyca (Maxillaria) ringens:

ITS: DQ210219\_Mormolyca\_ringens  
matK: EF079270\_Mormolyca\_ringens  
rbcL: AY368363\_Mormolyca\_ringens

Myoxanthus\_uncinatus:

ITS: AF262904\_Myoxanthus\_uncinatus  
matK: AF265478\_Myoxanthus\_uncinatus  
trnLF: AF265520\_Myoxanthus\_uncinatus

Myrmecophila\_cf\_tibicinus:

ITS: AF260203\_Myrmecophila\_cf\_tibicinis  
matK: AF263806\_Myrmecophila\_cf\_tibicinus  
trnLF: AF267035\_Myrmecophila\_cf\_tibicinus

Mystacidium:

ITS: DQ091572\_Mystacidium\_braybonae  
matK: DQ091361\_Mystacidium\_braybonae  
trnLF: DQ091486\_Mystacidium\_braybonae  
ycfla: EU490753\_Mystacidium\_aliceae

Nageliella (Domingoa) purpurea:

ITS: AF266743\_Nageliella\_purpurea  
matK: AF263771\_Nageliella\_purpurea  
trnLF: AF266980\_Nageliella\_purpurea

Neobathiea\_grandidierana:

ITS: DQ091590\_Neobathiea\_grandidierana  
matK: DQ091329\_Neobathiea\_grandidierana  
trnLF: DQ091453\_Neobathiea\_grandidierana

Neobenthamia (Polystachya) gracilis:

ITS: AF521064\_Neobenthamia\_gracilis  
matK: AY121734\_Neobenthamia\_gracilis  
nad1: AF314892\_Neobenthamia\_gracilis  
rbcL: AF518045\_Neobenthamia\_gracilis

trnLF: AF519943\_Neobenthamia\_gracilis  
xdh: GU004407\_Neobenthamia\_gracilis

Neocogniauxia\_hexaptera:

ITS: AY429385\_Neocogniauxia\_hexaptera  
matK: AF263766\_Neocogniauxia\_hexaptera  
rbcL: AF518037\_Neocogniauxia\_hexaptera  
trnLF: AY422444\_Neocogniauxia\_hexaptera

Neofinetia (Vanda) falcata:

ITS: EF079435\_Neofinetia\_falcata  
matK: AB217740\_Neofinetia\_falcata  
psaB: AY381041\_Neofinetia\_falcata  
rbcL: AF074197\_Neofinetia\_falcata  
trnLF: DQ091442\_Neofinetia\_falcata

Neogardneria\_murrayana:

ITS: AY870096\_Neogardneria\_murrayana  
matK: AY869997\_Neogardneria\_murrayana  
trnLF: AY869900\_Neogardneria\_murrayana

Neomoorea:

ITS: DQ210216\_Neomoorea\_wallisii  
matK: KM598438\_Neomoorea\_wallisii  
nad1: AF314893\_Neomoorea\_wallisii  
psaB: AY381042\_Neomoorea\_wallisii  
rbcL: AF074198\_Neomoorea\_irrorata  
trnLF: AF239533\_Neomoorea\_wallisii  
ycfla: EU490754\_Neomoorea\_wallisii

Nephelaphyllum:

ITS: AF521070\_Nephelaphyllum\_sp  
matK: AF263674\_Nephelaphyllum\_sp.  
psaB: AY381043\_Nephelaphyllum\_pulchrum  
rbcL: AY381127\_Nephelaphyllum\_pulchrum  
trnLF: AF519952\_Nephelaphyllum\_pulchrum

Nervilia:

ITS: AF324179\_Nervilia\_plicata  
matK: AJ310048\_Nervilia\_cf\_aragoana  
psaB: AY381044\_Nervilia\_bicarinata  
rbcL: AF074199\_Nervilia\_bicarinata  
trnLF: AJ409431\_Nervilia\_aragoana  
xdh: GU004465\_Nervilia\_kotschy

Neuwiedia:

ITS: AY557227\_Neuwiedia\_veratrifolia  
matK: AY557211\_Neuwiedia\_veratrifolia  
nad1: AF314829\_Neuwiedia\_veratrifolia  
psaB: AY381045\_Neuwiedia\_veratrifolia  
rbcL: AF074200\_Neuwiedia\_veratrifolia  
xdh: GU004525\_Apostasia\_nuda

Notylia:

ITS: EF079397\_Notyliia\_venezuelana  
matK: EF079193\_Notyliia\_venezuelana  
nad1: EF464143\_Notyliia\_venezuelana  
psaB: FJ534330\_Notyliia\_ecuadorensis  
rbcL: FJ534208\_Notyliia\_ecuadorensis  
trnLF: FJ562385\_Notyliia\_ecuadorensis  
xdh: GU004380\_Notyliia\_pittieri  
ycfla: FJ563626\_Notyliia\_ecuadorensis  
ycflb: FJ562914\_Notyliia\_ecuadorensis

Octomeria:

ITS: AF262911\_Octomeria\_gracilis  
matK: AY368421\_Octomeria\_gracilis  
nad1: AF314894\_Octomeria\_gracilis  
rbcL: AY368365\_Octomeria\_gracilis  
trnLF: AF265526\_Octomeria\_gracilis

Odontoglossum (Oncidium):

ITS: AF350773\_Odontoglossum\_harryanum  
matK: AF350648\_Odontoglossum\_harryanum  
nad1: EF464116\_Odontoglossum\_multistellare  
psaB: FJ534268\_Odontoglossum\_sanguineum  
rbcL: FJ534145\_Odontoglossum\_sanguineum  
trnLF: AF350727\_Odontoglossum\_harryanum  
ycfla: FJ563169\_Odontoglossum\_sanguineum  
ycflb: FJ562476\_Odontoglossum\_sanguineum

Oeonia\_rosea:

ITS: DQ091586\_Oeonia\_rosea  
matK: DQ091328\_Oeonia\_rosea  
trnLF: DQ091452\_Oeonia\_rosea

Oeoniella\_polystachys:

matK: DQ091432\_Oeoniella\_polystachys  
trnLF: DQ091557\_Oeoniella\_polystachys  
ycfla: EU490756\_Oeoniella\_polystachys

Oestlundia\_cyanocolumna:

ITS: AY429418\_Oestlundia\_cyanocolumna  
matK: AY396139\_Oestlundia\_cyanocolumna  
trnLF: AY422442\_Oestlundia\_cyanocolumna

Oliveriana\_brevilabra:

matK: EF079202\_Oliveriana\_brevilabia  
psaB: FJ534296\_Oliveriana\_brevilabia  
rbcL: FJ534174\_Oliveriana\_brevilabia  
trnLF: FJ562367\_Oliveriana\_brevilabia  
xdh: GU004385\_Oliveriana\_brevilabia  
ycfla: FJ563403\_Oliveriana\_brevilabia  
ycflb: FJ562763\_Oliveriana\_brevilabia

Oncidium:

ITS: AF350790\_Oncidium\_ghiesbreghtianum  
matK: FJ565136\_Oncidium\_ghiesbreghtianum

psaB: FJ534290\_Oncidium\_ghiesbreghtianum  
rbcL: FJ534168\_Oncidium\_ghiesbreghtianum  
trnLF: FJ562363\_Oncidium\_ghiesbreghtianum  
xdh: GU004378\_Oncidium\_uniflorum  
ycfla: FJ563805\_Oncidium\_ghiesbreghtianum  
ycflb: FJ563089\_Oncidium\_ghiesbreghtianum

Oreorchis:

ITS: EF525676\_Oreorchis\_patens  
matK: EU266418\_Oreorchis\_patens  
rbcL: EU391355\_Oreorchis\_patens  
trnLF: EU266436\_Oreorchis\_patens  
xdh: GU004435\_Oreorchis\_foliosa

Orleanesia\_pleurostachys:

ITS: AY008525\_Orleanesia\_pleurostachys  
matK: AY425800\_Orleanesia\_pleurostachys  
trnLF: AY422451\_Orleanesia\_pleurostachys

Ornithocephalus:

ITS: AF350507\_Ornithocephalus\_inflexus  
matK: AF239487\_Ornithocephalus\_inflexus  
psaB: FJ534350\_Ornithocephalus\_bicornis  
rbcL: FJ534228\_Ornithocephalus\_bicornis  
trnLF: AF350665\_Ornithocephalus\_inflexus  
xdh: GU004381\_Ornithocephalus\_inflexus  
ycfla: FJ563120\_Ornithocephalus\_inflexus  
ycflb: FJ562422\_Ornithocephalus\_inflexus

Otoglossum\_coronarum:

ITS: EF079410\_Otoglossum\_coronarum  
matK: FJ565100\_Otoglossum\_coronarum  
psaB: FJ534363\_Otoglossum\_coronarum  
rbcL: FJ534241\_Otoglossum\_coronarum  
trnLF: FJ562406\_Otoglossum\_coronarum  
ycfla: FJ563768\_Otoglossum\_coronarum  
ycflb: FJ563053\_Otoglossum\_coronarum

Pachyphyllum (Fernandezia):

ITS: DQ315828\_Pachyphyllum\_sp  
matK: FJ565077\_Pachyphyllum\_crystallinum  
nad1: AF314896\_Pachyphyllum\_sp.  
psaB: FJ534354\_Pachyphyllum\_crystallinum  
rbcL: FJ534232\_Pachyphyllum\_crystallinum  
trnLF: FJ562399\_Pachyphyllum\_crystallinum  
xdh: GU004382\_Pachyphyllum\_squarrosus  
ycfla: FJ563744\_Pachyphyllum\_crystallinum  
ycflb: FJ563031\_Pachyphyllum\_crystallinum

Palmorchis:

ITS: KM598431\_Palmorchis\_trilobulata  
matK: AJ310052\_Palmorchis\_trilobulata  
nad1: EF464155\_Palmorchis\_sp.  
psaB: AY381051\_Palmorchis\_trilobulata

rbcL: AF074206\_Palmorchis\_trilobulata  
trnLF: AJ409435\_Palmorchis\_trilobulata  
xdh: GU004471\_Palmorchis\_cf.\_silvicola  
ycfla: EU490757\_Palmorchis\_powellii

Paphinia:

matK: AF239471\_Paphinia\_neudeckeri  
trnLF: AF239567\_Paphinia\_neudeckeri  
xdh: GU004398\_Paphinia\_herrererae  
ycfla: EU490758\_Paphinia\_clausula

Peristeria\_elata:

ITS: AF239346\_Peristeria\_elata  
matK: AF239442\_Peristeria\_elata  
trnLF: AF239538\_Peristeria\_elata  
ycfla: EU490761\_Peristeria\_elata

Pescatorea\_coronaria:

ITS: AY870053\_Pescatoria\_coronaria  
matK: AY869954\_Pescatoria\_coronaria  
trnLF: AY869866\_Pescatoria\_coronaria

Phaius:

ITS: AF521051\_Phaius\_minor  
matK: AB040205\_Phaius\_tankervilleae  
nad1: EF464134\_Phaius\_tankervilleae  
psaB: AY381053\_Phaius\_tankervilleae  
rbcL: AF074210\_Phaius\_minor\_ribulose  
trnLF: AF519907\_Phaius\_minor  
xdh: GU004432\_Phaius\_flavus  
ycfla: EU490762\_Phaius\_tankervilleae

Phalaenopsis:

ITS: AF537012\_Phalaenopsis\_equestris  
matK: AF263677\_Phalaenopsis\_equestris  
nad1: AF314897\_Phalaenopsis\_amabilis  
psaB: AY381054\_Phalaenopsis\_equestris  
rbcL: AF074211\_Phalaenopsis\_equestris  
trnLF: AY273651\_Phalaenopsis\_equestris  
xdh: GU004411\_Phalaenopsis\_aphrodite  
ycfla: EU490763\_Phalaenopsis\_wilsonii

Phreatia:

ITS: AF521065\_Phreatia\_tahitensis  
matK: AY368425\_Phreatia\_tahitensis  
nad1: AF314898\_Phreatia\_tahitensis  
psaB: AY381056\_Phreatia\_sp  
rbcL: AF074214\_Phreatia\_sp  
trnLF: AF519944\_Phreatia\_tahitensis

Phymatidium:

ITS: DQ315834\_Phymatidium\_falcifolium  
matK: DQ315893\_Phymatidium\_falcifolium  
psaB: FJ534305\_Phymatidium\_falcifolium

rbcL: FJ534183\_Phymatidium\_falcifolium  
ycfla: FJ563463\_Phymatidium\_falcifolium  
ycflb: FJ562888\_Phymatidium\_tillandsioides

Platystele\_misera:

ITS: AF262823\_Platystele\_misera  
matK: AF265470\_Platystele\_misera  
trnLF: AF265504\_Platystele\_misera

Plectrophora\_cultrifolia:

matK: FJ564979\_Plectrophora\_cultrifolia  
psaB: FJ534335\_Plectrophora\_cultrifolia  
rbcL: FJ534213\_Plectrophora\_cultrifolia  
ycfla: FJ563644\_Plectrophora\_cultrifolia  
ycflb: FJ562932\_Plectrophora\_cultrifolia

Pleione:

ITS: EU100757\_Pleione\_formosana  
matK: AF302705\_Pleione\_formosana  
rbcL: AF264173\_Pleione\_formosana  
trnLF: AF519936\_Pleione\_chunii  
ycfla: EU490768\_Pleione\_formosana

Pleurothallis:

ITS: AF262859\_Pleurothallis\_endotrachys  
matK: AF265456\_Pleurothallis\_endotrachys  
nad1: AF314899\_Pleurothallis\_endotrachys  
psaB: AY381059\_Pleurothallis\_restrepioides  
rbcL: AF074217\_Pleurothallis\_endotrachys  
trnLF: AF265508\_Pleurothallis\_endotrachys

Podangis\_dactyloceras:

ITS: DQ091628\_Podangis\_dactyloceras  
matK: DQ091385\_Podangis\_dactyloceras  
trnLF: DQ091510\_Podangis\_dactyloceras

Podochilus\_cultratus:

ITS: AF521072\_Podochilus\_cultratus  
matK: AY121738\_Podochilus\_cultratus  
nad1: AF314900\_Podochilus\_cultratus  
psaB: AY381060\_Podochilus\_cultratus  
rbcL: AF074218\_Podochilus\_cultratus  
trnLF: AF519955\_Podochilus\_cultratus

Polycycnis\_gratiosa:

ITS: AF239373\_Polycycnis\_gratiosa  
matK: AF239469\_Polycycnis\_gratiosa  
trnLF: AF239565\_Polycycnis\_gratiosa  
ycfla: EU490769\_Polycycnis\_gratiosa

Polystachya:

ITS: AY008464\_Polystachya\_galeata  
matK: AY368426\_Polystachya\_pubescens  
nad1: AF314901\_Polystachya\_pubescens

psaB: AY381064\_Polystachya\_sp  
rbcL: AF074222\_Polystachya\_pubescens  
trnLF: AY008453\_Polystachya\_galeata  
xdh: GU004406\_Polystachya\_foliosa  
ycfla: EU490770\_Polystachya\_modesta

Pomatocalpa\_diffusum:  
ITS: AB217576\_Pomatocalpa\_diffusum  
matK: AB217752\_Pomatocalpa\_diffusum  
trnLF: EF670432\_Pomatocalpa\_diffusum

Ponera:  
ITS: AF260144\_Ponera\_exilis  
matK: AF263763\_Ponera\_exilis  
rbcL: AF518032\_Ponera\_exilis  
trnLF: AF266965\_Ponera\_striata  
xdh: GU004460\_Ponera\_cf.\_striata

Porroglossum\_amethyst:  
ITS: AF262804\_Porroglossum\_amethystinum  
matK: AF265448\_Porroglossum\_amethystinum  
trnLF: AF265491\_Porroglossum\_amethystinum

Promenaea:  
ITS: AY870100\_Promenaea\_ovatiloba  
matK: AY870001\_Promenaea\_ovatiloba  
nad1: AF314902\_Promenaea\_ovatiloba  
rbcL: AY368369\_Promenaea\_ovatiloba  
trnLF: AY869904\_Promenaea\_ovatiloba  
ycfla: EU123797\_Promenaea\_stapelioides

Prosthechea:  
ITS: AF260181\_Prosthechea\_abbreviata  
matK: AY396125\_Prosthechea\_aemula  
rbcL: AF518063\_Prosthechea\_abbreviata  
trnLF: AY422455\_Prosthechea\_abbreviata

Pseudolaelia\_vellozicola:  
ITS: AY008489\_Pseudolaelia\_vellozicola  
matK: AY121748\_Pseudolaelia\_vellozicola  
rbcL: AF518057\_Pseudolaelia\_vellozicola  
trnLF: AF266994\_Pseudolaelia\_vellozicola

Psychilis\_krugii:  
ITS: AF260157\_Psychilis\_krugii  
matK: AF263772\_Psychilis\_krugii  
trnLF: AF266981\_Psychilis\_krugii

Psychopsis:  
ITS: AF239405\_Psychopsis\_papilio  
matK: AF239501\_Psychopsis\_papilio  
psaB: FJ534264\_Psychopsis\_sanderæ  
rbcL: FJ534141\_Psychopsis\_sanderæ  
trnLF: AF350740\_Psychopsis\_papilio



ycfla: FJ563278\_Psychopsis\_papilio  
ycflb: FJ562585\_Psychopsis\_papilio

Quisqueya\_ekmanii:

ITS: AY008567\_Quisqueya\_ekmanii  
matK: AY425796\_Quisqueya\_ekmanii  
trnLF: AY422447\_Quisqueya\_ekmanii

Rangaeris:

ITS: DQ091634\_Rangaeris\_amaniensis  
matK: DQ091386\_Rangaeris\_amaniensis  
trnLF: DQ091512\_Rangaeris\_amaniensis  
ycfla: EU490774\_Rangaeris\_muscicola

Raycadenco (Fernandezia):

matK: FJ565127\_Raycadenco\_ecuadorensis  
nad1: EF464157\_Raycadenco\_sp.  
psaB: FJ534371\_Raycadenco\_ecuadorensis  
rbcL: FJ534249\_Raycadenco\_ecuadorensis  
trnLF: FJ562413\_Raycadenco\_ecuadorensis  
ycfla: FJ563796\_Raycadenco\_ecuadorensis  
ycflb: FJ563080\_Raycadenco\_ecuadorensis

Restrepia:

ITS: AF262907\_Restrepia\_aristulifera  
matK: AF265481\_Restrepia\_aristulifera  
nad1: AF314903\_Restrepia\_chocoensis  
psaB: AY381072\_Restrepia\_sanguinea  
rbcL: AY370653\_Restrepia\_xanthophthalma  
trnLF: AF265522\_Restrepia\_aristulifera

Rhipidoglossum:

ITS: DQ091583\_Rhipidoglossum\_kamerunense  
matK: DQ091367\_Rhipidoglossum\_kamerunense  
trnLF: DQ091492\_Rhipidoglossum\_kamerunense  
ycfla: EU490775\_Rhipidoglossum\_xanthopollinium

Rhyncholaelia\_glauca:

ITS: AY008584\_Rhyncholaelia\_glauca  
matK: AY396101\_Rhyncholaelia\_glauca  
trnLF: AY422404\_Rhyncholaelia\_glauca

Rhynchostele\_londesberg:

ITS: AF350530\_Rhynchostele\_londesboroughiana  
matK: AF350609\_Rhynchostele\_londesboroughiana  
psaB: FJ534280\_Rhynchostele\_londesboroughiana  
rbcL: FJ534157\_Rhynchostele\_londesboroughiana  
trnLF: AF350688\_Rhynchostele\_londesboroughiana  
ycfla: FJ563224\_Rhynchostele\_londesboroughiana  
ycflb: FJ562534\_Rhynchostele\_londesboroughiana

Ridleyella\_paniculata:

ITS: AF521069\_Ridleyella\_paniculata  
matK: AY121737\_Ridleyella\_paniculata

rbcL: AF518048\_Ridleyella\_paniculata  
trnLF: AF519951\_Ridleyella\_paniculata

Rodriguezia:

ITS: AF350543\_Rodriguezia\_delcastilloi  
matK: AF350622\_Rodriguezia\_delcastilloi  
nad1: AF314904\_Rodriguezia\_lanceolata  
psaB: FJ534333\_Rodriguezia\_batemanii  
rbcL: FJ534211\_Rodriguezia\_batemanii  
trnLF: AF350701\_Rodriguezia\_delcastilloi  
ycfla: FJ563579\_Rodriguezia\_delcastilloi  
ycflb: FJ562870\_Rodriguezia\_delcastilloi

Rossioglossum\_schlieper:

ITS: EF079414\_Rossioglossum\_schlieperianum  
matK: EF079221\_Rossioglossum\_schlieperianum  
nad1: EF464158\_Rossioglossum\_schlieperianum  
psaB: FJ534258\_Rossioglossum\_schlieperianum  
rbcL: FJ534136\_Rossioglossum\_schlieperianum  
trnLF: FJ562350\_Rossioglossum\_schlieperianum  
ycfla: FJ563140\_Rossioglossum\_schlieperianum  
ycflb: FJ562445\_Rossioglossum\_schlieperianum

Rudolfiella:

ITS: AY870110\_Rudolfiella\_saxicola  
matK: AF239433\_Rudolfiella\_saxicola  
psaB: FJ534334\_Rudolfiella\_sp  
rbcL: FJ534212\_Rudolfiella\_sp  
trnLF: AY063449\_Rudolfiella\_saxicola  
ycfla: EU490776\_Rudolfiella\_saxicola  
ycflb: FJ562930\_Rudolfiella\_sp.

Saundersia\_paniculata:

matK: FJ564734\_Saundersia\_paniculata  
psaB: FJ534278\_Saundersia\_paniculata  
rbcL: FJ534155\_Saundersia\_paniculata  
trnLF: FJ562358\_Saundersia\_paniculata  
ycfla: FJ563214\_Saundersia\_paniculata  
ycflb: FJ562523\_Saundersia\_paniculata

Scaphosepalum:

ITS: AF262817\_Scaphosepalum\_gibberosum  
matK: AF265458\_Scaphosepalum\_gibberosum  
rbcL: AF518041\_Scaphosepalum\_gibberosum  
trnLF: AF265503\_Scaphosepalum\_gibberosum  
xdh: GU004455\_Scaphosepalum\_ursinum  
ycfla: EU490777\_Scaphosepalum\_rapax

Scaphyglottis:

ITS: AY174720\_Scaphyglottis\_punctulata  
matK: AF263786\_Scaphyglottis\_punctulata  
rbcL: AF518064\_Scaphyglottis\_punctulata  
trnLF: AF267011\_Scaphyglottis\_punctulata  
ycfla: EU490778\_Scaphyglottis\_amparoana

Schlimmia:

ITS: AF239366\_Schlimmia\_sp  
matK: AF239462\_Schlimmia\_sp  
trnLF: AF239558\_Schlimmia\_sp

Schomburgkia (Laelia) splendida:

ITS: AY008573\_Schomburgkia\_splendida  
matK: AY396105\_Schomburgkia\_splendida  
trnLF: AY422408\_Schomburgkia\_splendida

Schunkea\_vierlingii:

psaB: FJ534300\_Schunkea\_vierlingii  
rbcL: FJ534178\_Schunkea\_vierlingii  
ycfla: FJ563425\_Schunkea\_vierlingii  
ycflb: FJ562721\_Schunkea\_vierlingii

Scuticaria:

ITS: AF239328\_Scuticaria\_hadwenii  
matK: AF239424\_Scuticaria\_hadwenii  
nad1: AF314905\_Scuticaria\_sp.  
rbcL: AY368370\_Scuticaria\_hadwenii  
trnLF: AF239520\_Scuticaria\_hadwenii

Sedirea (Phalaenopsis) japonica:

ITS: AB217585\_Sedirea\_japonica  
matK: AB217761\_Sedirea\_japonica  
trnLF: EF670433\_Sedirea\_japonica

Seegeriella\_pinifolia:

ITS: EF079398\_Seegeriella\_pinifoliae  
matK: FJ564829\_Seegeriella\_pinifolia  
nad1: EF464159\_Seegeriella\_pinifolia  
psaB: FJ534299\_Seegeriella\_pinifolia  
trnLF: FJ562369\_Seegeriella\_pinifolia  
ycfla: FJ563424\_Seegeriella\_pinifolia  
ycflb: FJ562720\_Seegeriella\_pinifolia

Seidenfadenia\_mitrata:

ITS: AB217586\_Seidenfadenia\_mitrata  
matK: AB217762\_Seidenfadenia\_mitrata  
trnLF: EF670414\_Seidenfadenia\_mitrata

Sievekingia:

ITS: AF239356\_Sievekingia\_colombiana  
matK: AF239452\_Sievekingia\_colombiana  
trnLF: AF239548\_Sievekingia\_colombiana  
ycfla: JF692058\_Sievekingia\_sp.

Sigmatostalix (Oncidium) picta:

ITS: AF350832\_Sigmatostalix\_picta  
matK: AF350651\_Sigmatostalix\_picta  
trnLF: AF350730\_Sigmatostalix\_picta

Sobralia:

ITS: KM598432\_Sobralia\_mucronata  
matK: AF263681\_Sobralia\_macrantha  
nad1: EF464132\_Sobralia\_rosea  
psaB: AY381076\_Sobralia\_macrantha  
rbcL: AF074228\_Sobralia\_macrantha  
trnLF: KM598440\_Sobralia\_crocea  
xdh: GU004464\_Sobralia\_crispissima  
ycfla: EU490782\_Sobralia\_crocea

Solenangis\_aphylla:

ITS: DQ091652\_Solenangis\_aphylla  
matK: DQ091400\_Solenangis\_aphylla  
trnLF: DQ091525\_Solenangis\_aphylla

Solenidium\_portillae:

matK: FJ565067\_Solenidium\_portillae  
psaB: FJ534328\_Solenidium\_portillae  
rbcL: FJ534206\_Solenidium\_portillae  
trnLF: FJ562384\_Solenidium\_portillae  
ycfla: FJ563734\_Solenidium\_portillae  
ycflb: FJ563021\_Solenidium\_portillae

Sophronitis (Cattleya) coccinea:

ITS: AY008646\_Sophronitis\_coccinea  
matK: AF263804\_Sophronitis\_coccinea  
rbcL: AF518072\_Sophronitis\_coccinea  
trnLF: AF267033\_Sophronitis\_coccinea

Spathoglottis:

matK: AY368429\_Spathoglottis\_plicata  
nad1: AF314906\_Spathoglottis\_plicata  
psaB: AY381077\_Spathoglottis\_pacifica  
rbcL: AF264175\_Spathoglottis\_plicata  
xdh: GU004431\_Spathoglottis\_pacifica

Stanhopea:

ITS: AF239349\_Stanhopea\_ecornuta  
matK: AF239445\_Stanhopea\_ecornuta  
nad1: AF314907\_Stanhopea\_tigrina  
psaB: AY381079\_Stanhopea\_sp  
rbcL: AF074230\_Stanhopea\_ecornuta  
trnLF: AF239541\_Stanhopea\_ecornuta  
ycfla: EU490787\_Stanhopea\_tigrina  
ycflb: FJ562532\_Stanhopea\_tigrina

Stelis\_argentata:

ITS: AF262878\_Stelis\_argentata  
matK: AF265464\_Stelis\_argentata  
trnLF: AF265510\_Stelis\_argentata

Stellilabium (Telipogon) pogonostalix:

ITS: AF350511\_Stellilabium\_pogonostalix  
matK: AF239488\_Stellilabium\_pogonostalix

nad1: AF314908\_Stellilabium\_pogonostalix  
psaB: AY381080\_Stellilabium\_pogonostalix  
rbcL: AF074231\_Stellilabium\_pogonostalix

Stenia\_bismarckii:  
ITS: AY870019\_Stenia\_bismarckii  
matK: AY869920\_Stenia\_bismarckii  
nad1: EF464109\_Stenia\_bismarckii  
trnLF: AY869834\_Stenia\_bismarckii

Stenotyla\_lankasteriana:  
ITS: AY870061\_Stenotyla\_lankesteriana  
matK: AY869962\_Stenotyla\_lankesteriana  
trnLF: AY869874\_Stenotyla\_lankesteriana

Sutrina\_garayi:  
matK: FJ564828\_Sutrina\_garayi  
psaB: FJ534298\_Sutrina\_garayi  
rbcL: FJ534176\_Sutrina\_garayi  
ycfla: FJ563423\_Sutrina\_garayi  
ycflb: FJ562719\_Sutrina\_garayi

Symphyglossum (Oncidium) sanguineum:  
ITS: AF350789\_Symphyglossum\_sanguineum  
matK: AF350647\_Symphyglossum\_sanguineum  
trnLF: AF350726\_Symphyglossum\_sanguineum

Systemoglossum\_acuminatum:  
ITS: AF350528\_Systemoglossum\_acuminatum  
matK: AF350607\_Systemoglossum\_acuminatum  
psaB: FJ534287\_Systemoglossum\_acuminatum  
rbcL: FJ534165\_Systemoglossum\_acuminatum  
trnLF: AF350686\_Systemoglossum\_acuminatum  
ycfla: FJ563286\_Systemoglossum\_acuminatum  
ycflb: FJ562590\_Systemoglossum\_acuminatum

Tainia\_hookeriana:  
matK: EF079342\_Tainia\_hookeriana  
rbcL: AF264176\_Tainia\_hookeriana  
xdh: GU004410\_Tainia\_hookeriana

Telipogon:  
ITS: DQ315838\_Telipogon\_barbozae  
matK: DQ315897\_Telipogon\_barbozae  
nad1: EF464131\_Telipogon\_sp.  
psaB: FJ534312\_Telipogon\_barbozae  
rbcL: FJ534190\_Telipogon\_barbozae  
trnLF: DQ315923\_Telipogon\_barbozae  
ycfla: FJ563525\_Telipogon\_barbozae  
ycflb: FJ562782\_Telipogon\_bombiformis

Tetramicra\_elegans:  
ITS: AY008566\_Tetramicra\_elegans  
matK: AY396094\_Tetramicra\_elegans

trnLF: AY422397\_Tetramicra\_elegans

Thecostele:

matK: AY368431\_Thecostele\_sp.  
nad1: AF314909\_Thecostele\_sp.  
rbcL: AY368371\_Thecostele\_alata  
trnLF: KM598441\_Thecostele\_sp.  
xdh: GU004401\_Thecostele\_secunda

Thunia:

ITS: AF302741\_Thunia\_alba  
matK: AF263684\_Thunia\_alba  
nad1: AF314910\_Thunia\_alba  
psaB: AY381083\_Thunia\_marshalliana  
rbcL: AF074233\_Thunia\_alba  
xdh: GU004439\_Thunia\_alba

Tipularia\_discolor:

ITS: KM598422\_Tipularia\_discolor  
matK: AF263685\_Tipularia\_discolor  
psaB: AY381084\_Tipularia\_discolor  
rbcL: AF074234\_Tipularia\_discolor  
ycfla: EU490789\_Tipularia\_discolor

Tolumnia\_calochila:

ITS: AF350532\_Tolumnia\_calochila  
matK: AF350611\_Tolumnia\_calochila  
psaB: FJ534281\_Tolumnia\_calochila  
rbcL: FJ534158\_Tolumnia\_calochila  
trnLF: AF350690\_Tolumnia\_calochila  
ycfla: FJ563375\_Tolumnia\_calochila  
ycflb: FJ562537\_Tolumnia\_calochila

Trevoria:

ITS: AF239365\_Trevoria\_zahlbruckneriana  
matK: AF239461\_Trevoria\_zahlbruckneriana  
trnLF: AF239557\_Trevoria\_zahlbruckneriana  
xdh: GU004394\_Trevoria\_escobariana

Trichocentrum:

ITS: AF350574\_Trichocentrum\_jonesianum  
matK: AF350653\_Trichocentrum\_jonesianum  
psaB: FJ534345\_Trichocentrum\_lindenii  
rbcL: FJ534223\_Trichocentrum\_lindenii  
trnLF: AF350732\_Trichocentrum\_jonesianum  
ycfla: FJ563188\_Trichocentrum\_jonesianum  
ycflb: FJ562496\_Trichocentrum\_jonesianum

Trichoceros:

ITS: DQ315884\_Trichoceros\_muralis  
matK: DQ315913\_Trichoceros\_muralis  
psaB: FJ534348\_Trichoceros\_antennifer  
rbcL: FJ534226\_Trichoceros\_antennifer  
trnLF: DQ315939\_Trichoceros\_muralis

ycfla: FJ563379\_Trichoceros\_muralis  
ycflb: FJ562901\_Trichoceros\_muralis

Trichoglottis\_atropurp:  
ITS: DQ091713\_Trichoglottis\_atropurpurea  
matK: DQ091316\_Trichoglottis\_atropurpurea  
trnLF: DQ091440\_Trichoglottis\_atropurpurea  
ycfla: EU490791\_Trichoglottis\_atropurpurea

Trichopilia\_subulata:  
ITS: AF350578\_Trichopilia\_subulata  
matK: FJ565033\_Trichopilia\_subulata  
psaB: FJ534276\_Trichopilia\_subulata  
rbcL: FJ534153\_Trichopilia\_subulata  
trnLF: AF350736\_Trichopilia\_subulata  
ycfla: FJ563698\_Trichopilia\_subulata  
ycflb: FJ562521\_Trichopilia\_subulata

Trichosalpinx\_blaisdellii:  
ITS: AF262887\_Trichosalpinx\_blaisdellii  
matK: AF265474\_Trichosalpinx\_blaisdellii  
trnLF: AF265498\_Trichosalpinx\_blaisdellii

Tridactyle\_bicaudata:  
ITS: DQ091639\_Tridactyle\_bicaudata  
matK: DQ091388\_Tridactyle\_bicaudata  
trnLF: DQ091514\_Tridactyle\_bicaudata

Trigonidium (Maxillaria) egertonianum:  
ITS: AF239329\_Trigonidium\_egertonianum  
matK: DQ210714\_Trigonidium\_egertonianum  
trnLF: AF239521\_Trigonidium\_egertonianum

Triphora\_trianthophora:  
ITS: KM598428\_Triphora\_trianthophora  
matK: AY368433\_Triphora\_trianthophora  
psaB: AY381086\_Triphora\_trianthophora  
rbcL: AF074236\_Triphora\_trianthophora  
trnLF: KM669160\_Triphora\_trianthophora

Trisetella\_scobina:  
ITS: AF262808\_Trisetella\_scobina  
matK: AF265449\_Trisetella\_scobina  
trnLF: AF265492\_Trisetella\_scobina

Trizeuxis\_falcata:  
matK: FJ565131\_Trizeuxis\_falcata  
psaB: FJ534274\_Trizeuxis\_falcata  
rbcL: FJ534151\_Trizeuxis\_falcata  
trnLF: FJ562357\_Trizeuxis\_falcata  
ycfla: FJ563198\_Trizeuxis\_falcata  
ycflb: FJ562507\_Trizeuxis\_falcata

Tropidia:

ITS: KM598433\_Tropidia\_sp.  
matK: AF263686\_Tropidia\_sp.  
nad1: EF464141\_Tropidia\_curculigoides  
psaB: AY381087\_Tropidia\_effusa  
rbcL: AF074237\_Tropidia\_sp  
xdh: GU004477\_Tropidia\_graminea  
ycfla: EU490793\_Tropidia\_polystachya

Vanda\_flabellata:

ITS: DQ091675\_Vanda\_flabellata  
matK: DQ091317\_Vanda\_flabellata  
trnLF: DQ091441\_Vanda\_flabellata  
xdh: GU004413\_Vanda\_flabellata

Vasqueziella\_boliviana:

ITS: AF239377\_Vasqueziella\_boliviana  
matK: AF239473\_Vasqueziella\_boliviana  
trnLF: AF239569\_Vasqueziella\_boliviana

Vitekorkis\_excavatus:

matK: FJ565094\_Vitekorchis\_excavatus  
psaB: FJ534362\_Vitekorchis\_excavatus  
rbcL: FJ534240\_Vitekorchis\_excavatus  
ycfla: FJ563762\_Vitekorchis\_excavatus  
ycflb: FJ562813\_Vitekorchis\_excavatus

Warczewiczella:

ITS: AY870058\_Warczewiczella\_discolor  
matK: AY869959\_Warczewiczella\_discolor  
trnLF: AY869871\_Warczewiczella\_discolor  
ycfla: EU490794\_Warczewiczella\_marginata

Warrea:

ITS: AF239321\_Warrea\_warreana  
matK: AF239417\_Warrea\_warreana  
trnLF: AF239513\_Warrea\_warreana  
xdh: GU004386\_Warrea\_costaricensis  
ycfla: EU123798\_Warrea\_warreana

Warmingia\_zamorana:

psaB: FJ534306\_Warmingia\_zamorana  
rbcL: FJ534184\_Warmingia\_zamorana  
ycfla: FJ563473\_Warmingia\_zamorana  
ycflb: FJ562770\_Warmingia\_zamorana

Wullschlaegelia:

ITS: KM598429\_Wull\_aphylla  
xdh: GU004466\_Wullschlaegelia\_calcarata

Xerorchis:

ITS: KM598434\_Xerorchis\_amazonica  
matK: AF263688\_Xerorchis\_amazonica  
psaB: AY381096\_Xerorchis\_amazonica  
rbcL: AF074244\_Xerorchis\_amazonica



trnLF: KM598442\_Xerorchis\_amazonica  
xdh: GU004468\_Xerorchis\_amazonica

Xylobium:

ITS: AF239340\_Xylobium\_leontoglossum  
matK: DQ209970\_Xylobium\_leontoglossum  
nad1: EF464114\_Xylobium\_squalens  
psaB: AY381097\_Xylobium\_variegatum  
rbcL: AF074245\_Xylobium\_sp  
trnLF: AF239532\_Xylobium\_leontoglossum  
ycfla: EU490795\_Xylobium\_pallidiflorum

Ypsilopus\_longifolius:

ITS: DQ091636\_Ypsilopus\_longifolius  
matK: DQ091393\_Ypsilopus\_longifolius  
trnLF: DQ091519\_Ypsilopus\_longifolius

Zelenkoa\_onusta:

ITS: AF350555\_Zelenkoa\_onusta  
matK: EF079195\_Zelenkoa\_onusta  
psaB: FJ534318\_Zelenkoa\_onusta  
rbcL: FJ534196\_Zelenkoa\_onusta  
trnLF: FJ562379\_Zelenkoa\_onusta  
ycfla: FJ563178\_Zelenkoa\_onusta  
ycflb: FJ562485\_Zelenkoa\_onusta

Zootrophion\_dayanum:

ITS: AF262895\_Zootrophion\_dayanum  
matK: AF265452\_Zootrophion\_dayanum  
trnLF: AF265499\_Zootrophion\_dayanum

Zygopetalum:

ITS: AF239322\_Zygopetalum\_mackaii  
matK: EF079243\_Zygopetalum\_mackayi  
nad1: EF464130\_Zygopetalum\_maxillare  
psaB: AY381098\_Zygopetalum\_mackaii  
rbcL: AF074246\_Zygopetalum\_intermedium  
trnLF: AF239514\_Zygopetalum\_mackaii  
xdh: GU004387\_Zygopetalum\_maculatum  
ycfla: EU123799\_Zygopetalum\_maxillare  
ycflb: FJ562864\_Zygopetalum\_maxillare

Zygostates:

ITS: EF079390\_Zygostates\_alleniana  
matK: EF079225\_Zygostates\_alleniana  
nad1: EF464127\_Zygostates\_alleniana  
psaB: FJ534302\_Zygostates\_alleniana  
rbcL: FJ534180\_Zygostates\_alleniana  
trnLF: DQ315941\_Zygostates\_alleniana  
ycfla: FJ563435\_Zygostates\_alleniana  
ycflb: FJ563064\_Zygostates\_apiculata

Galeandra:

matK: AY368408\_Galeandra\_devoniana

nad1: Galeandra\_devoniana\_AF314876  
psaB: AY381011\_Galeandra\_devoniana  
rbcL: AF074171\_Galeandra\_devoniana  
xdh: GU004393\_Galeandra\_villosa  
ycf1a: JF692079\_Galeandra\_sp.

Nohawilliamsia:

psaB: FJ534311\_Nohawilliamsia\_orthostates  
rbcL: FJ534189\_Nohawilliamsia\_orthostates  
trnLF: FJ562375\_Nohawilliamsia\_orthostates  
ycf1a: FJ563521\_Nohawilliamsia\_orthostates  
ycf1b: FJ562816\_Nohawilliamsia\_orthostates
