# Supplementary material
Source: PubMed Central journal article supplement (PMC4343289)
Supplement: supp_mcu253_aob-14600-s10.pdf [file supp_mcu253_aob-14600-s10.pdf]

```

-- Neuwiedia
  -- Cyripedium
  --99--- Paphiopedilum
    -- Platanthera
    --100| -- Spiranthes
    --89--- Cryptostylis
    --100| -- Palmorchis
      -- Cephalanthera
      --100| -- Listera
      --75--- Epipactis
      --100| -- Sobralia
        --100--- Elleanthus
          -- Tropidia
          --100--- Corymborkis
          -- Xerorchis
          --99| -- Nervilia
            --65| -- Triphora trianthophora
            --100--- Monophyllorchis
            -- Arundina graminifolia
            -- Anthogonidium gracile
            -- Calopogon
            --100--- Arethusa
            -- Eria
            --93| --99| -- Podochilus cultratus
            --100--- Appendicula cornuta
            -- Phreatia
            --66| -- Malaxis
            --100--- Liparis
            -- Bulbophyllum
            --90| -- Dendrobium
            --99--- Cadetia
            -- Bletilla
            --93| -- Thunia
            --68--- Glomera
            --54| --78| -- Pleione
            --97| -- Dendrochilum
            --80--- Coelogyne cristata
            -- Acanthephippium mant
            -- Phaius
            --100--- Calanthe
            --99| -- Spathoglottis
            --99--- Ancistrochilus roths
            --59| -- Nephalephyllum
            --98--- Collabium
            -- Polystachya
            --100--- Neobenthamia gracilis
            -- Phalaenopsis
            --100| --100| -- Neofinetia falcata
            --100--- Ascocentrum
            --100| -- Angraecum
            --99--- Aeranthes
            --100| -- Diaphananche
            --99+-- Campylocentrum
            -- Aerangis
            -- Earina
            --82| --99--- Agrostophyllum majus
            -- Coelia
            -- Tipularia discolor
            --99| --100--- Calypso
            --77| --89| -- Govenia
            --100| -- Oreorchis
            --100--- Aplectrum hyemale
            -- Chysis bractescens
            --95| --89| -- Bletia
            --100| -- Hexalectris
            --97--- Basiphyllaea hamiltoniana
            -- Arpophyllum giganteum
            -- Encyclia
            --98| --100| -- Scaphyglottis
            --99--- Hexadesmia
            --100| -- Laelia
            -- Epidendrum
            --98| --61| -- Meiracyllium trinasutum
            --65--- Cattleya
            -- Poneria
            --100--- Isochilus
            --52| -- Dilomilis montana
            --99| -- Octomeria
            --88| -- Restrepia
            --61| -- Masdevallia
            --80| -- Scaphosepalum
            --100--- Pleurothallis
            -- Grammatophyllum
            --99| -- Thecostele
            --99--- Cymbidium
            -- Cyrtopodium
            -- Eulophia
            --79--- Ansellia
            -- Galeandra
            --100| -- Catasetum
            --73| -- Dressleria
            --100| -- Cynoches
            -- Warrea
            -- Zygopetalum
            --52--- Promenaea
            --100| -- Huntleya
            --99--- Chondrorhyncha
            -- Dichaea
            --99| --95--- Cryptarrhena
            --71| -- Eriopsis
            -- Lycomorium
            -- Houletia
            --62| -- Gongora
            --81| -- Stanhopea
            --100+--100--- Coryanthes
            -- Kegeliella
            --59| --88--- Acineta
            -- Scuticaria
            --98+-- Rudolphiella
            -- Bifrenaria
            --70| -- Maxillaria
            --94--- Cryptocentrum
            --59| -- Xylobium
            --62+-- Neomoorea
            -- Lycaste
            -- Psychopsis
            --100| -- Trichopilia subulata
            --100--- Helcia brevis
            -- Lockhartia
            -- Rossioglossum schlieper
            --90--- Cuitlauzina candida
            -- Grandiphyllum auriculum
            --91| -- Trichocentrum
            --100| --99--- Saundersia paniculata
            -- Trichoceros
            -- Hofmeisterella eumicro
            --100| -- Telipogon
            --100--- Stellilabium pogonostalix
            -- Raycadenco
            --99| --99| --100| -- Pachyphyllum
            --100--- Fernandezia ionanthera
            --75| -- Phymatidium
            --100| -- Zygostates
            --100| --100--- Dipteranthus grandiflorus
            --55| -- Chytroglossa marileoniae
            --100| -- Ornithocephalus
            --95+-- Hintonella mexicana
            -- Eloyella thienii
            -- Vitekorkis excavatus
            --63| -- Oncidium
            --99--- Odontoglossum
            -- Otaglossum coronarium
            --84| -- Cyrtochiloides ochmat
            --92| -- Cyrtochilum myanthum
            --99--- Caucaea phalaenopsis
            -- Miltonia regnellii
            -- Cischweinfia dasyandra
            --99| --99| -- Systeloglossum acuminatum
            --100| --100--- Oliveriana brevilabra
            --91| -- Aspasia lunata
            -- Brassia
            --63| -- Bracthia andina
            --62| -- Mesospinidium
            --99--- Ada
            -- Rhynchoatele londesberg
            --100--- Erycina hyalinobulbon
            -- Gomesa planifolia
            --93| -- Nohawilliamsia
            -- Zelenkoa onusta
            --86| -- Tolunnia calochila
            --76--- Plectrophora cultrifolia
            -- Solenidium portillae
            --91+--75--- Capanemia
            -- Leochilus
            -- Ionopsis minutiflora
            --79+-- Hirtzia Benzingsii
            --99| -- Comparettia
            -- Warmingia zamorana
            --85| -- Trizeuxis falcata
            -- Sutrina garayi
            -- Seegeriella pinifolia
            --97+-- Rodriquezia
            -- Notylia
            -- Macroclinium
            -- Macradenia rubescens

```
