# Supplementary material
Source: PubMed Central journal article supplement (PMC4343289)
Supplement: supp_mcu253_aob-14600-s20.pdf [file supp_mcu253_aob-14600-s20.pdf]

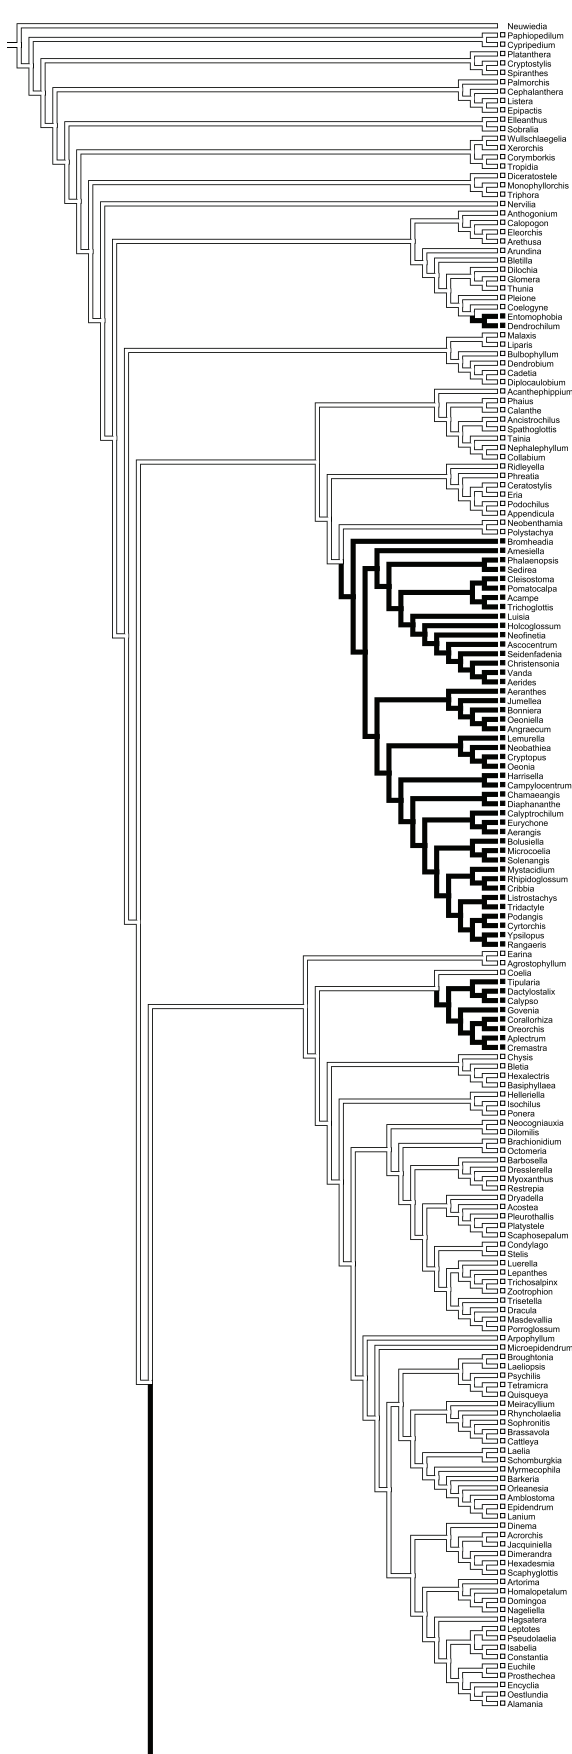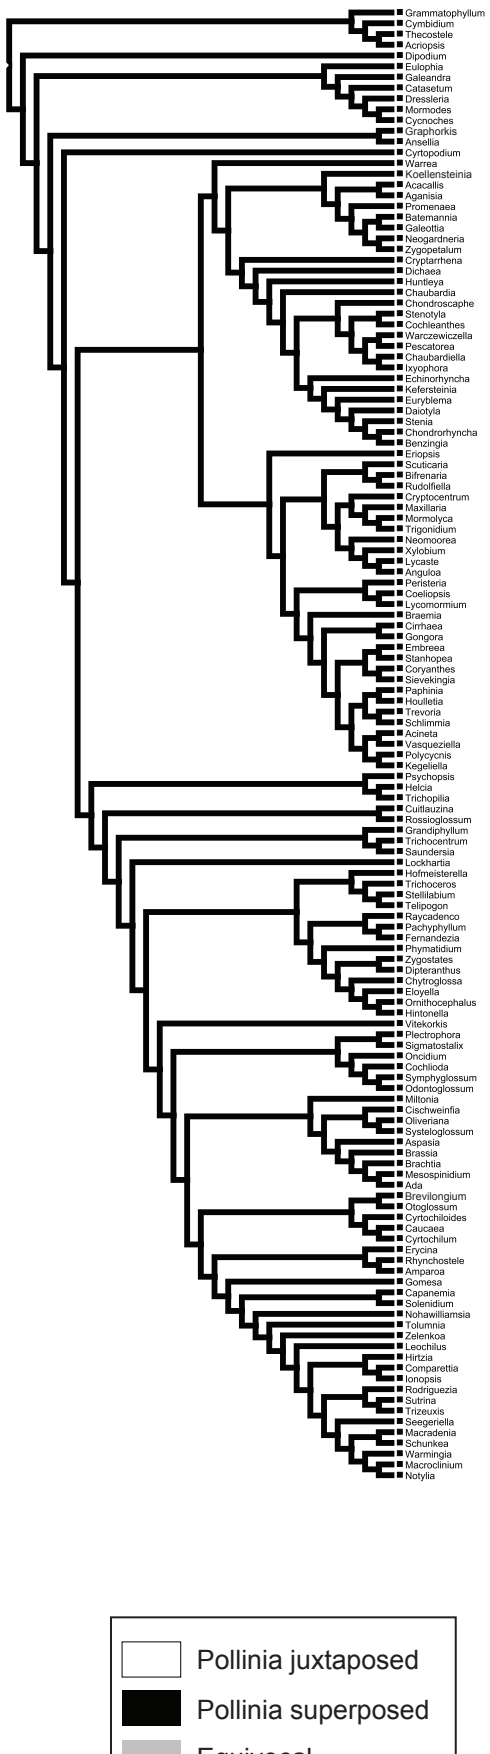

Pollinia juxtaposed  
 Pollinia superposed  
 Equivocal

- Neuwiedia
- Psychopodium
- Cyrtopodium
- Psittacanthus
- Cryptostylis
- Spiranthes
- Palmeria
- Cephalanthus
- Lisiera
- Epipactis
- Elkianthus
- Soraria
- Wulfschlaegelia
- Xanthochilus
- Corymborkis
- Tropidia
- Dicranostele
- Monophylloides
- Triphora
- Nervilia
- Anthogonium
- Calopogon
- Elachorhis
- Archusa
- Arundina
- Besleria
- Dilochia
- Chamaena
- Thunia
- Platone
- Coselogyne
- Enicosphebia
- Dendrochilum
- Malaxis
- Liparis
- Bulbophyllum
- Dendrobium
- Caselia
- Diplocaulobium
- Acathephippium
- Phaius
- Calanthe
- Anacardium
- Spahoglossum
- Tania
- Nephrolepis
- Colabium
- Rhynchostylis
- Phreatia
- Ceratostylis
- Eria
- Prostichilus
- Appendicula
- Neobornthalia
- Polystichia
- Bornhadiella
- Amesella
- Phalaenopsis
- Scleria
- Cleistanthus
- Pomatocalpa
- Acropogon
- Trichoglossum
- Lusia
- Holcoglossum
- Neofinetia
- Ascochloa
- Sclerostylis
- Chiridactylus
- Vanda
- Aerides
- Aeranthus
- Jumellea
- Bomarea
- Caonilla
- Angreum
- Murina
- Neobathia
- Cryptopus
- Osonia
- Harrisella
- Campylocentrum
- Chamaea
- Aeranthus
- Calyptrochilus
- Eurychorda
- Aerangis
- Bolusella
- Microcaulis
- Solenopsis
- Myriophyllum
- Rhipidoglossum
- Cribbia
- Liparis
- Tridactyle
- Postelsia
- Cyrtorchilus
- Ysidosus
- Rangaria
- Eairia
- Agrostophyllum
- Coelia
- Trinaria
- Dactyloctenium
- Calypso
- Corallorhiza
- Oncidium
- Aplectrum
- Oreanthes
- Chysis
- Basia
- Hexaletris
- Basiphylloides
- Helleria
- Ischilus
- Ponera
- Neocogniauxia
- Dilomus
- Brachyrodium
- Oncidium
- Barborea
- Drescherella
- Myriophyllum
- Restrepia
- Dryadella
- Acrostichum
- Psittacanthus
- Platytele
- Scaphopetalum
- Condylium
- Stelia
- Luerella
- Liparis
- Trichostylis
- Zootrophion
- Tristelia
- Dracula
- Masdevallia
- Porroglossum
- Agrostophyllum
- Microglossum
- Braughtonia
- Laelospes
- Psychilus
- Tetramora
- Calypso
- Mesasphecia
- Rhynchostylis
- Sophronitis
- Brasavola
- Cattleya
- Laelia
- Schomburgkia
- Mymecophila
- Barkeria
- Oreanthes
- Amelostoma
- Epidendrum
- Lanum
- Dinensia
- Acrostichum
- Jacquinella
- Dimeridia
- Hexadactylis
- Scaphyloides
- Artocria
- Hemaphysalium
- Domingia
- Nagellia
- Haplophragma
- Lepidochloa
- Pseudobulbium
- Isabella
- Corallorhiza
- Euclyptus
- Prosthechea
- Encyclia
- Oestlundia
- Alamania

- Grammatophyllum
- Cymbidium
- Thecodelpha
- Acropogon
- Diplopoda
- Eulophia
- Galeandra
- Catantop
- Oreanthes
- Mormodes
- Cyrtorchilus
- Graphorhis
- Ansella
- Cyrtopodium
- Warrea
- Koellensteinia
- Acacallis
- Agamia
- Promenaea
- Batemanina
- Galactia
- Neogardneria
- Zygopetalum
- Cyrtanthera
- Dichaea
- Huntleya
- Chaubardia
- Chondrosaphe
- Stenolyta
- Gochieanthus
- Warczewiczella
- Pascatarea
- Chaubardella
- Ixyophora
- Echinorhyncha
- Kofleria
- Euryblema
- Dactylo
- Stenia
- Chondrorhyncha
- Benzingia
- Griopsis
- Scuticaria
- Bifrenaria
- Rusoffia
- Cryptocentrum
- Maxillaria
- Kormolucca
- Trigonidium
- Neomooorea
- Kylobium
- Lycaste
- Anguloa
- Peristeria
- Coelopsis
- Lycocommum
- Braema
- Cirrhosa
- Gongora
- Embryssa
- Slanthepea
- Coryanthes
- Stylocheilus
- Paphia
- Houlletia
- Triporia
- Schismia
- Acineta
- Passerella
- Polycycnis
- Kegelella
- Psychopsis
- Heliopsis
- Trichopilia
- Cultia
- Stenoglossum
- Grandiphylloides
- Trichopetalum
- Saundersia
- Lockhartia
- Holmeisterella
- Trichoceros
- Stellilabium
- Talipogon
- Raydeno
- Pachyphyllum
- Fernandezia
- Rhytidium
- Zygodactylus
- Dipteranthus
- Chytroglossa
- Eloyella
- Omitheophyllus
- Hintonella
- Vitekorkis
- Plectrophora
- Sigmatostylis
- Oncidium
- Cochlidia
- Symphoglossum
- Odontoglossum
- Miltonia
- Gischweinfia
- Oliveriana
- Systeloglossum
- Aspidia
- Brassia
- Brachia
- Mesospidium
- Ada
- Brevilongium
- Ologlossum
- Cyrtocloides
- Caucaea
- Cyrtocloium
- Erycina
- Rhynchostele
- Amaraea
- Gomesa
- Capanea
- Scleridium
- Nohawilliamsia
- Tolumnia
- Zelentia
- Leochilus
- Hirtzia
- Compantella
- Conopsis
- Rodriguezia
- Sutria
- Fitzingeria
- Seegerella
- Macrademia
- Schunkeia
- Warmingia
- Macroclivium
- Noxia
