# Supplementary material
Source: PubMed Central journal article supplement (PMC4343289)

Neuwiedia

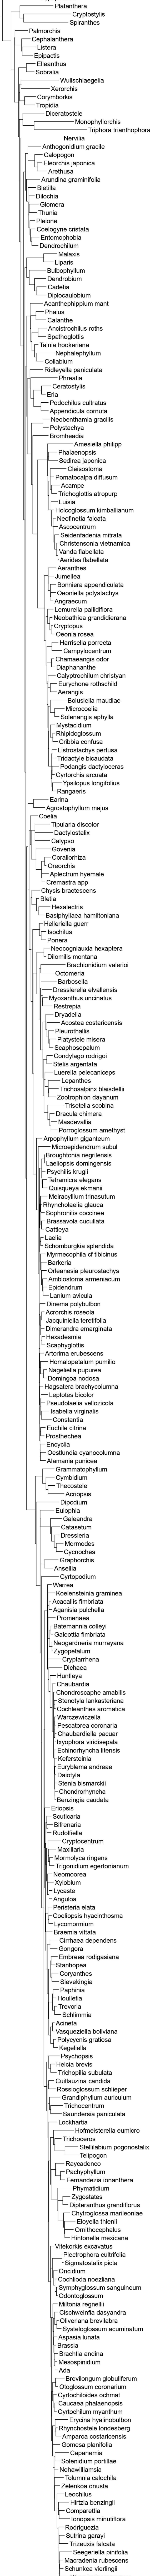

Supplement: supp_mcu253_aob-14600-s05.pdf [file supp_mcu253_aob-14600-s05.pdf]

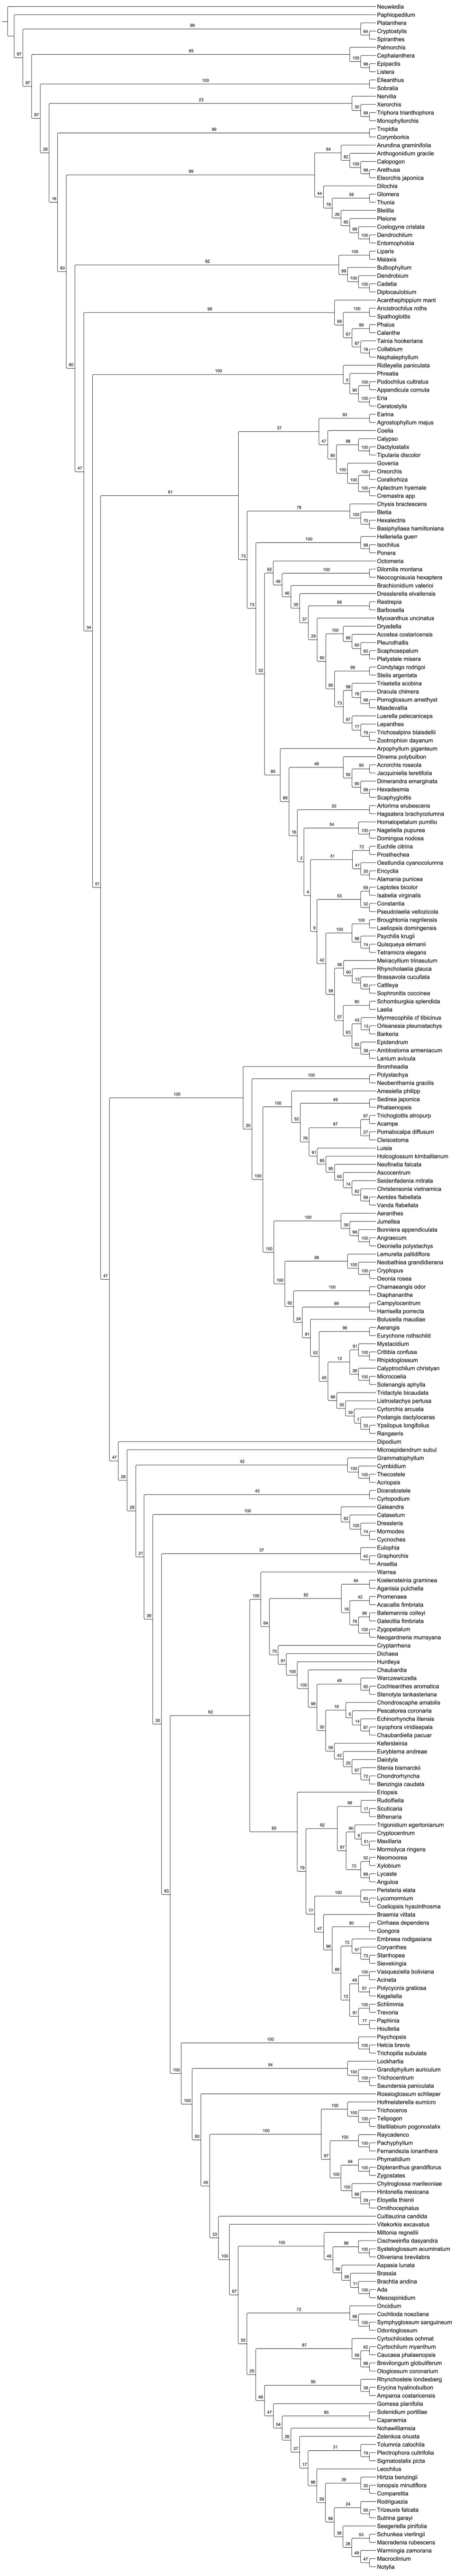

Supplement: supp_mcu253_aob-14600-s06.pdf [file supp_mcu253_aob-14600-s06.pdf]

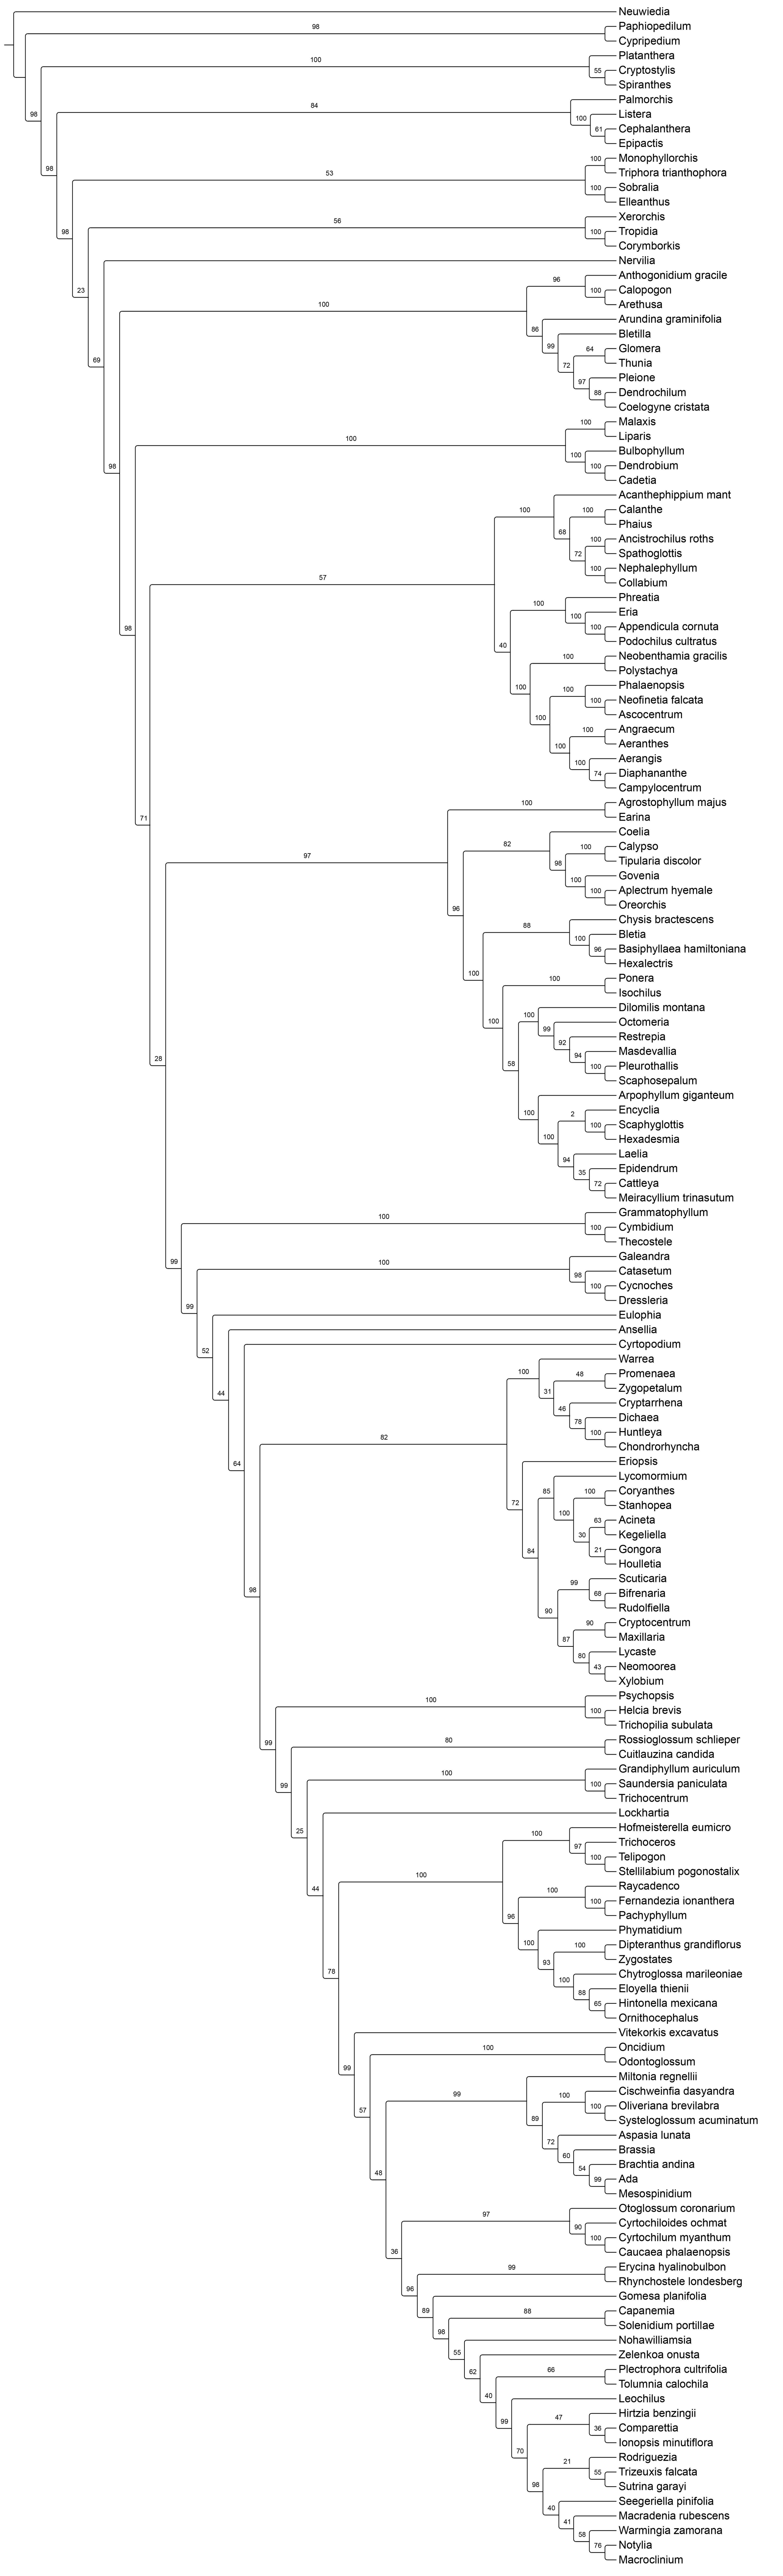

Supplement: supp_mcu253_aob-14600-s08.pdf [file supp_mcu253_aob-14600-s08.pdf]

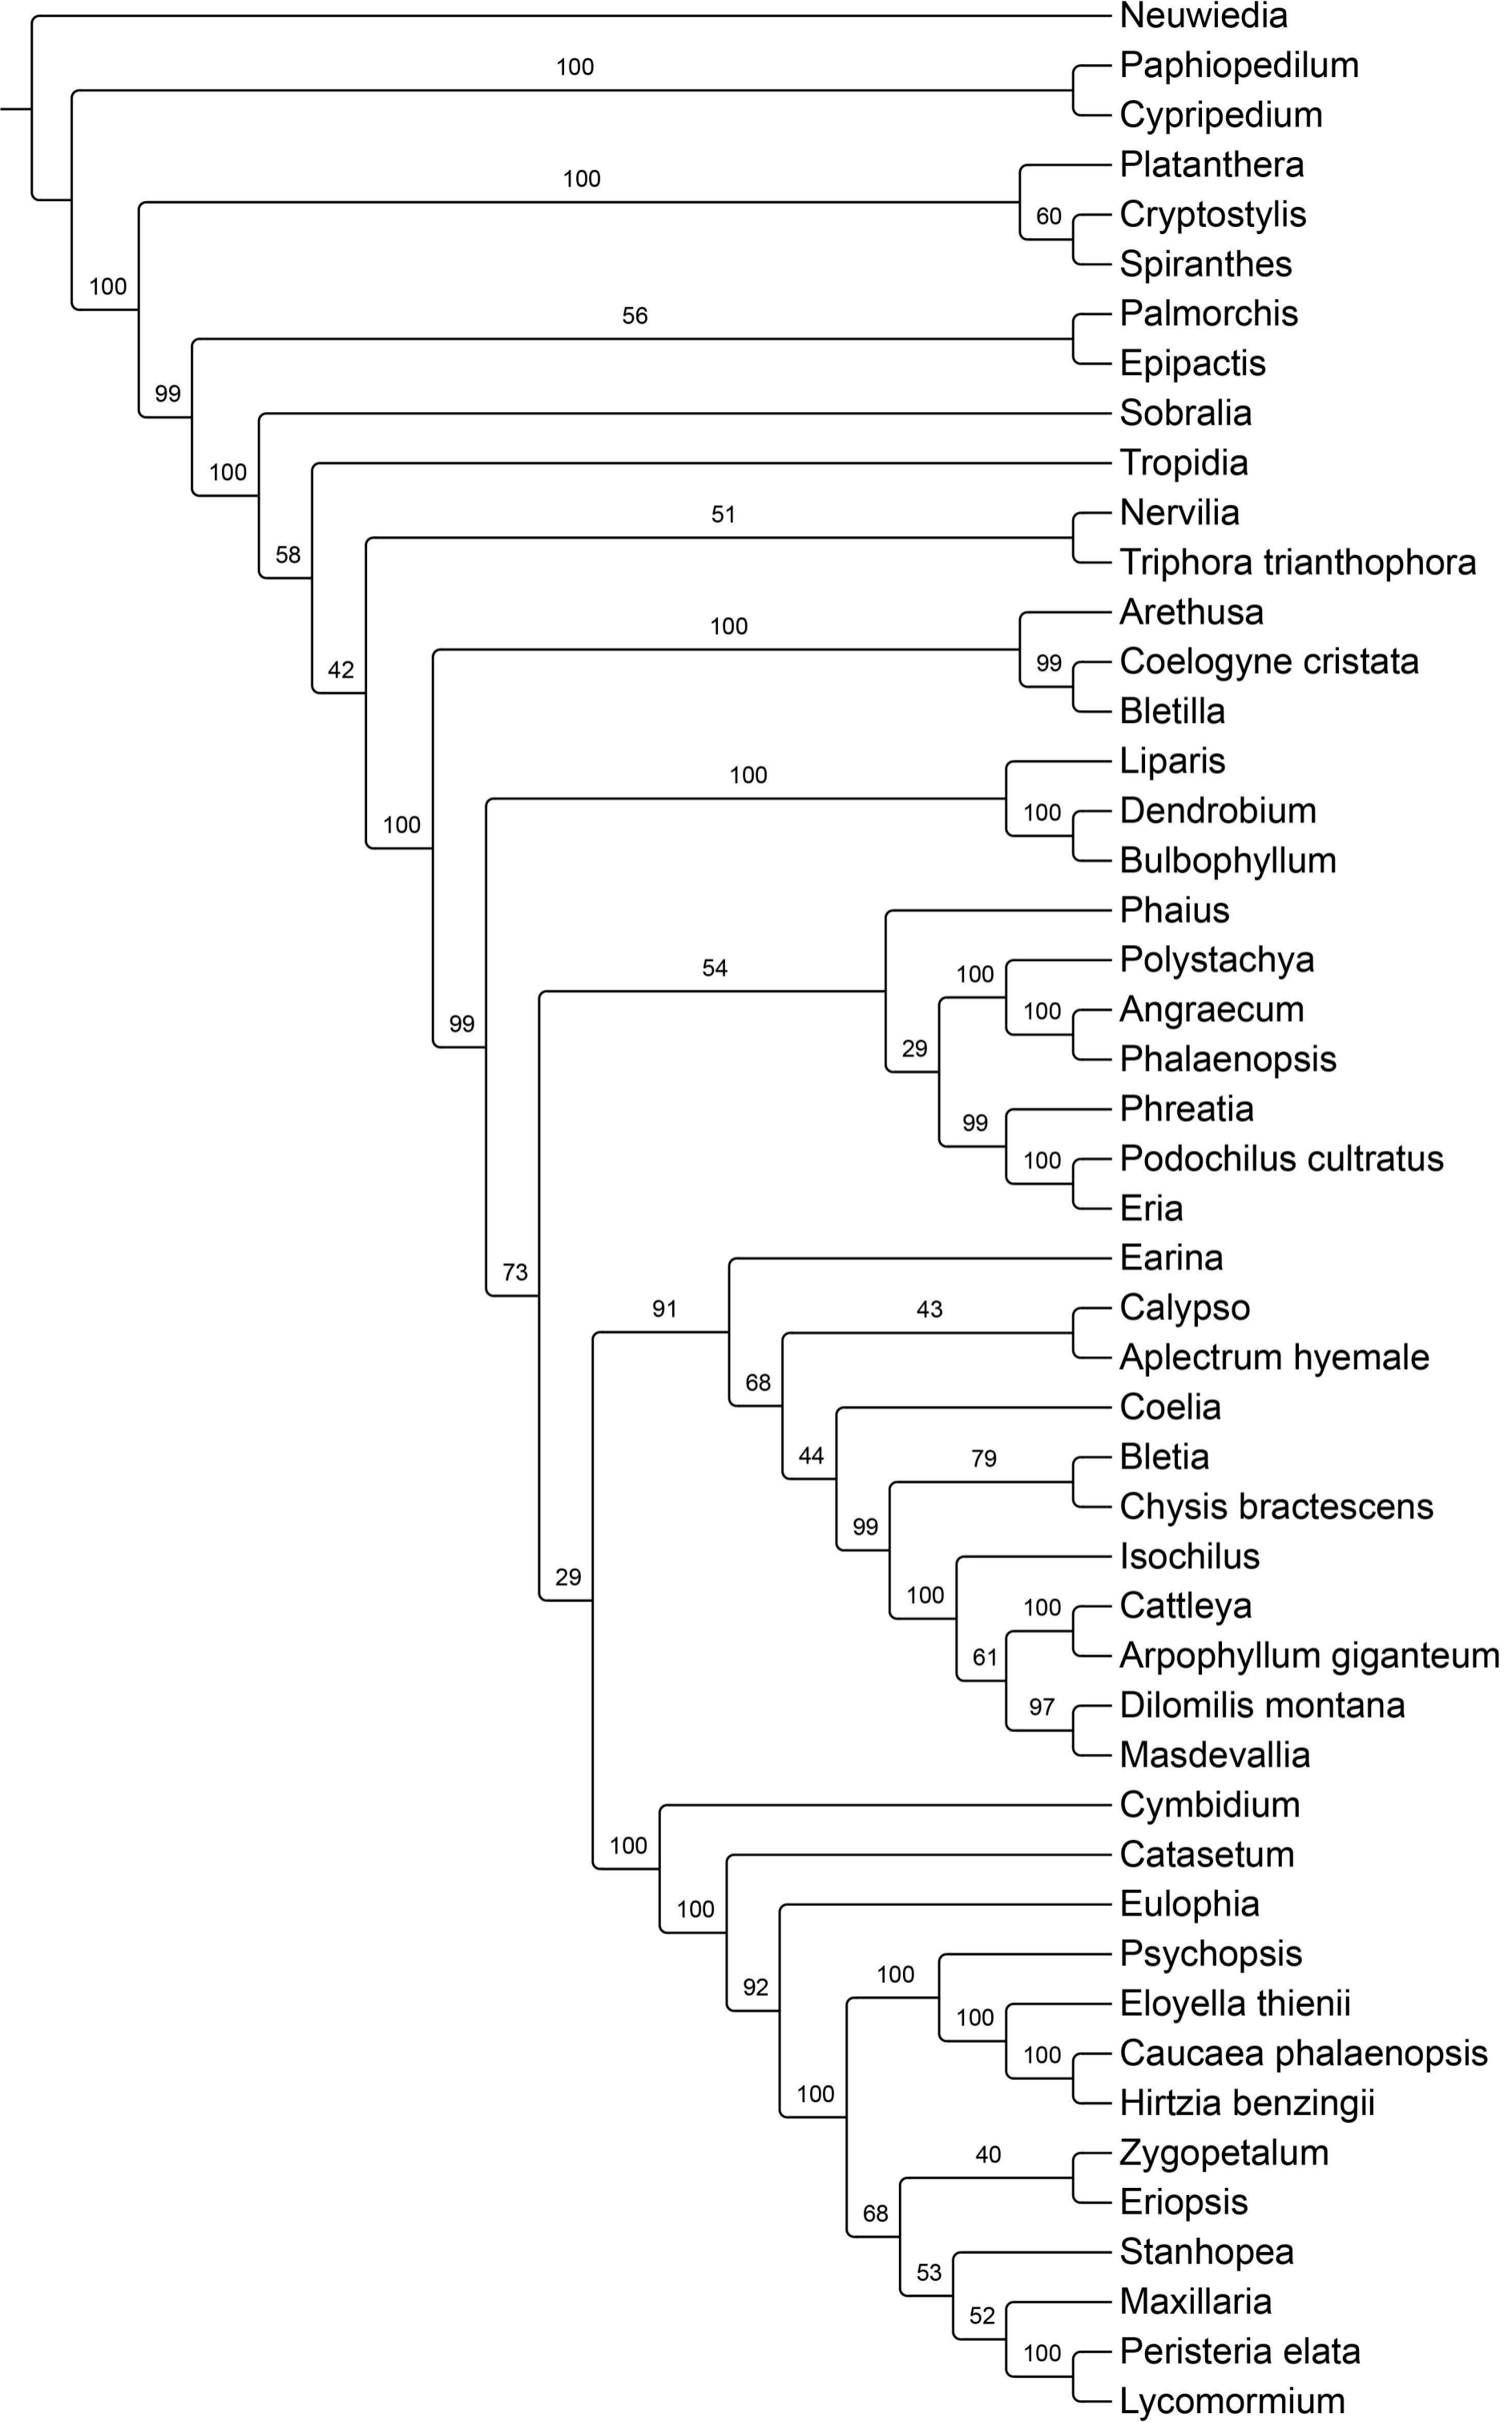

Supplement: supp_mcu253_aob-14600-s09.pdf [file supp_mcu253_aob-14600-s09.pdf]

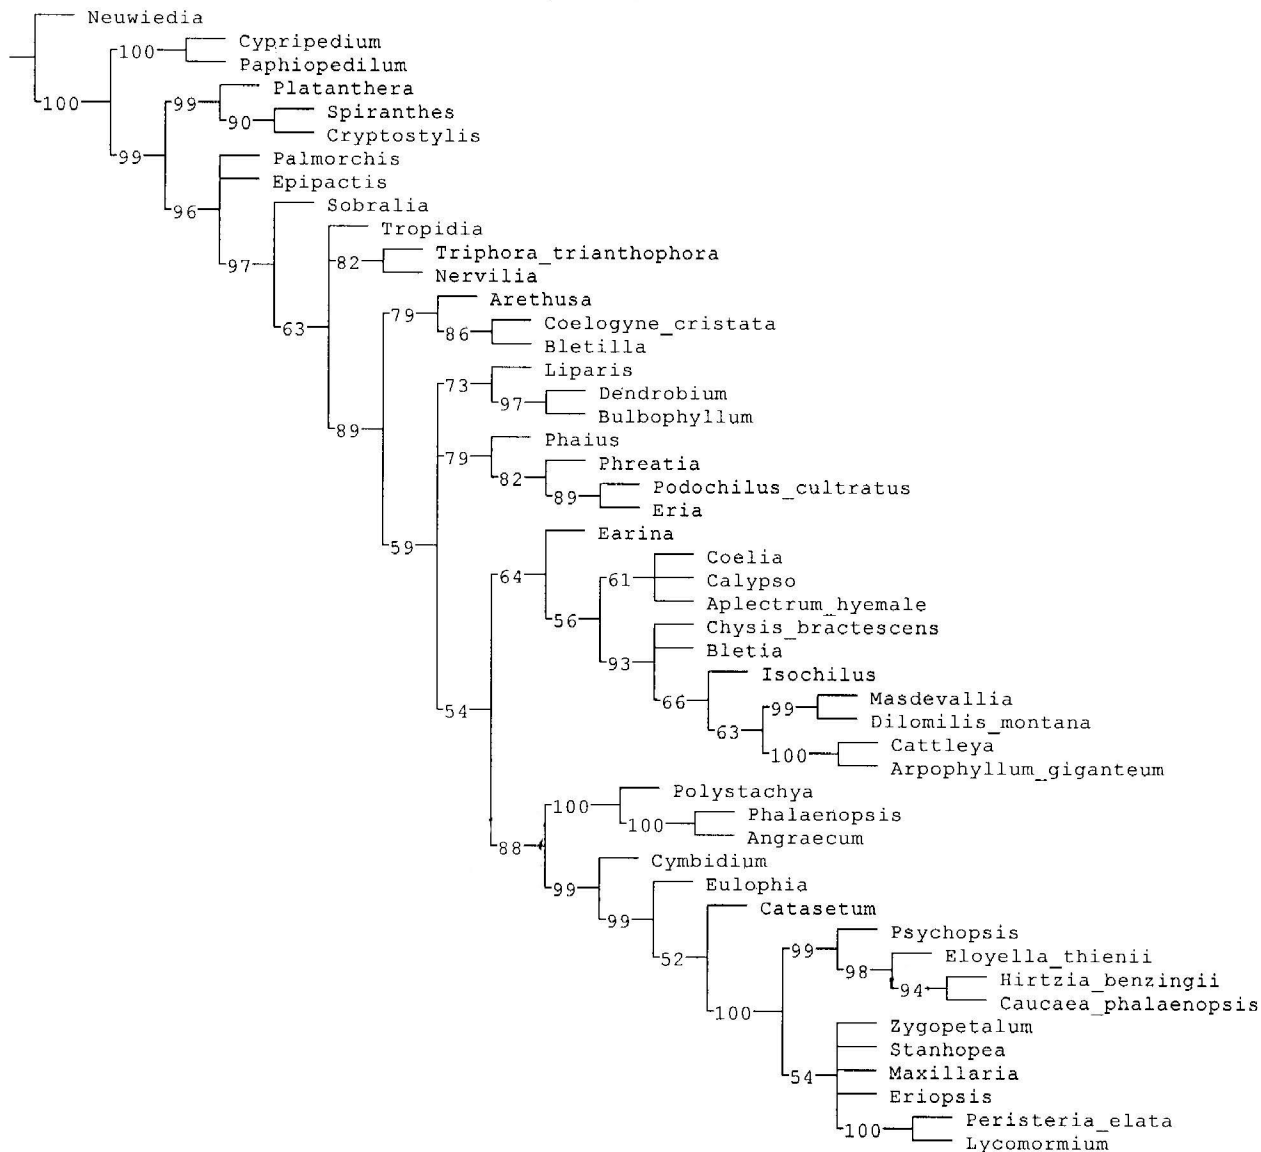

Supplement: supp_mcu253_aob-14600-s11.pdf [file supp_mcu253_aob-14600-s11.pdf]

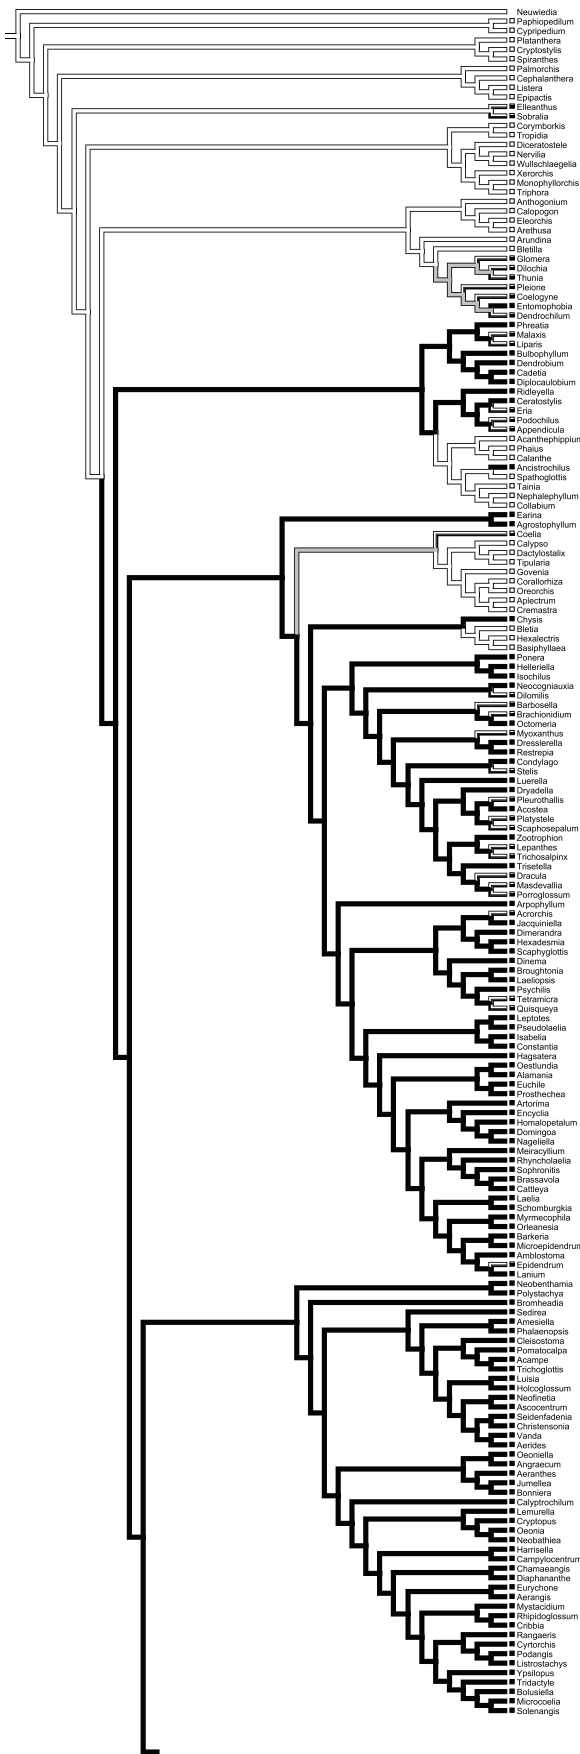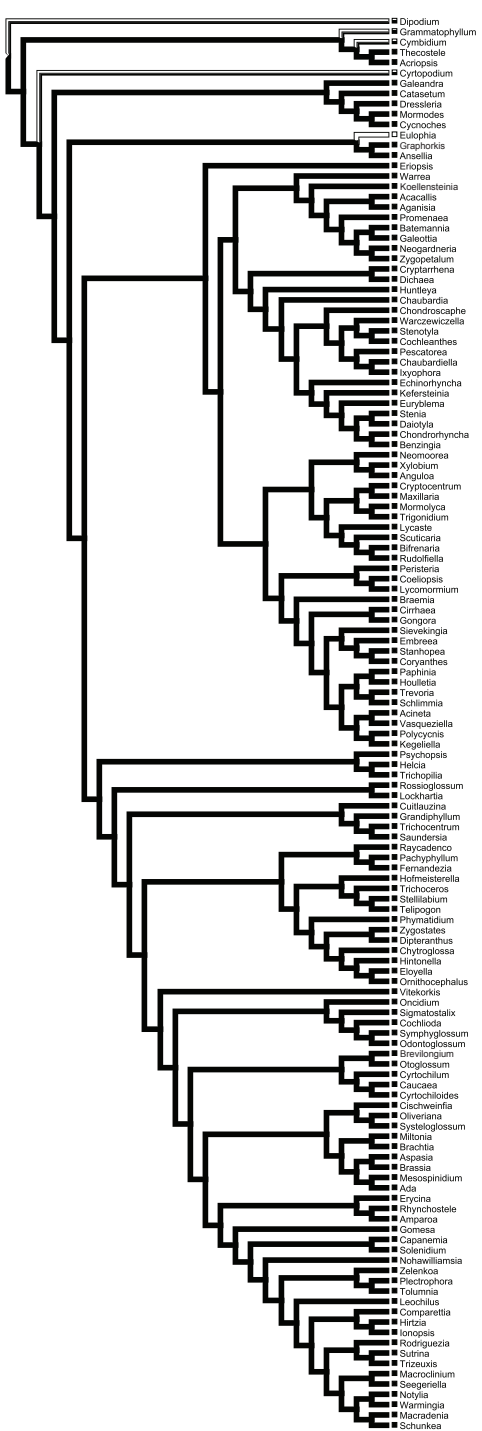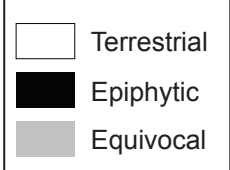

Supplement: supp_mcu253_aob-14600-s13.pdf [file supp_mcu253_aob-14600-s13.pdf]

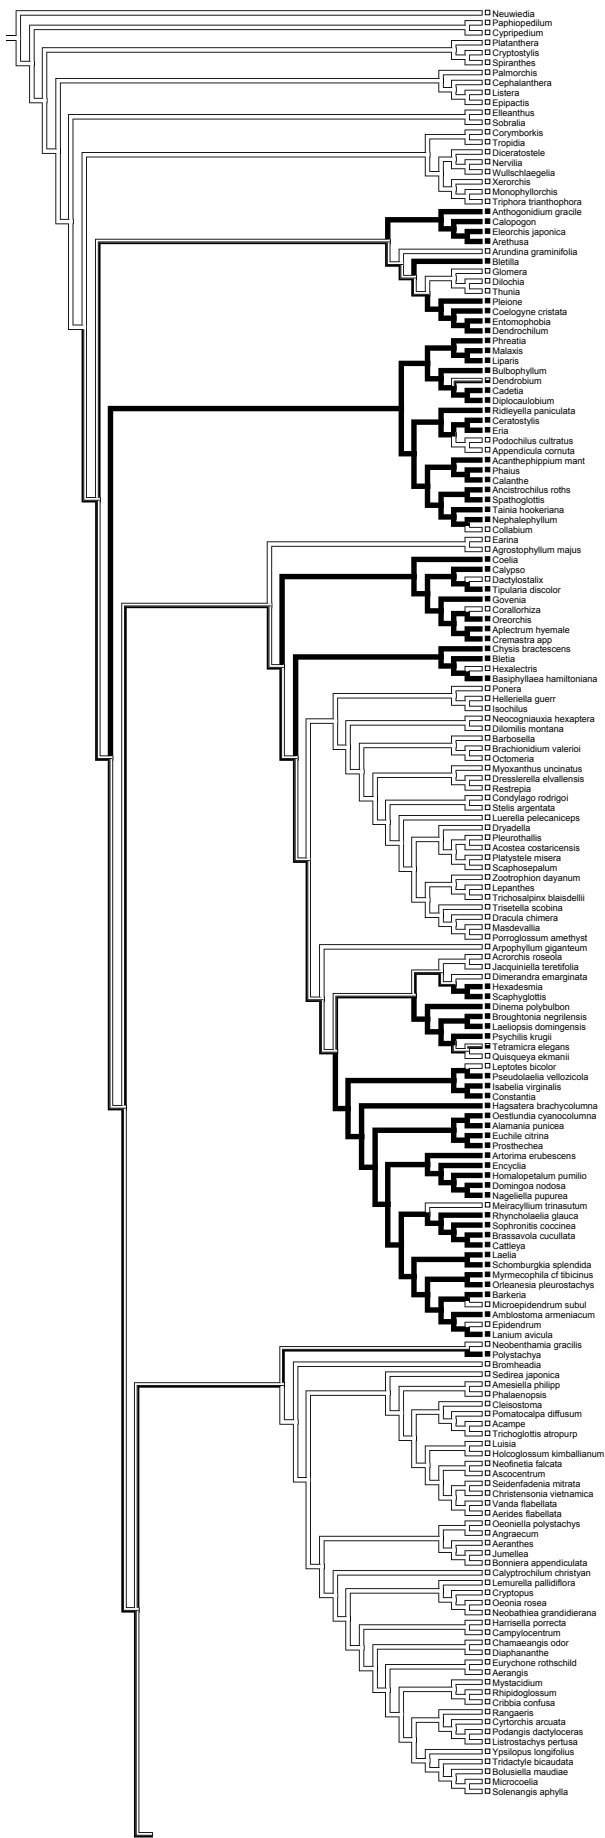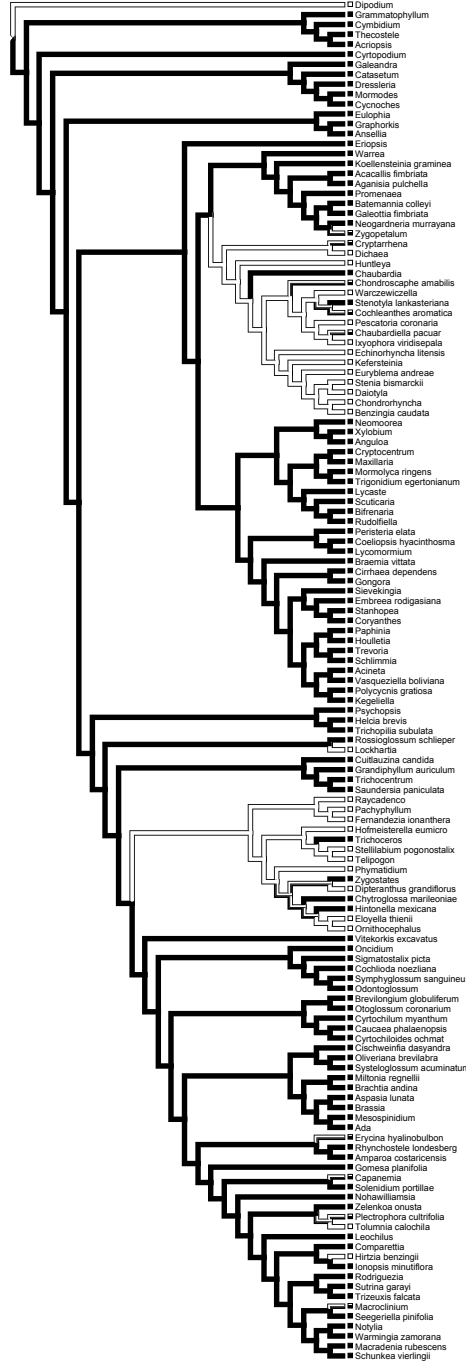

Corm/pseudobulb absent  
 Corm/pseudobulb present  
 Equivocal

Supplement: supp_mcu253_aob-14600-s15.pdf [file supp_mcu253_aob-14600-s15.pdf]

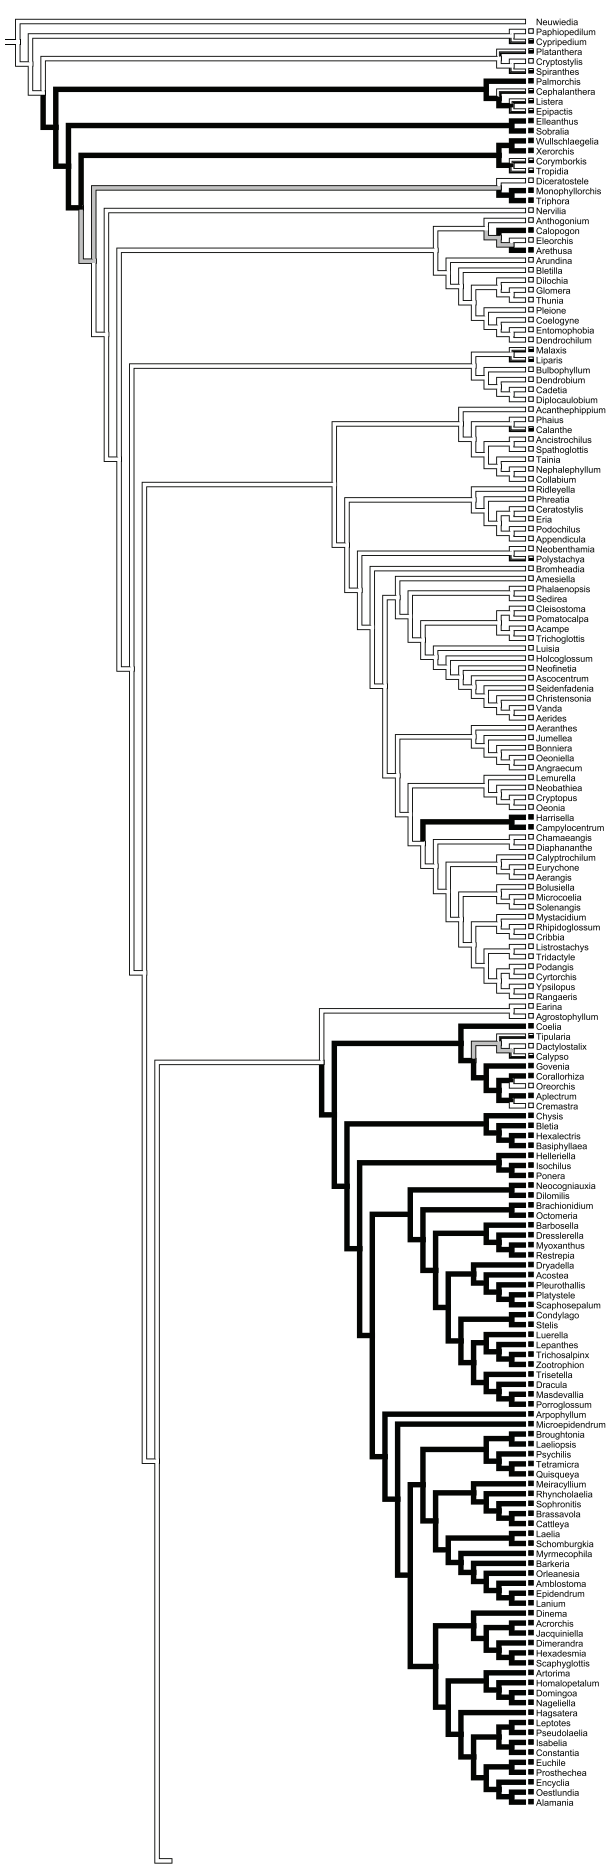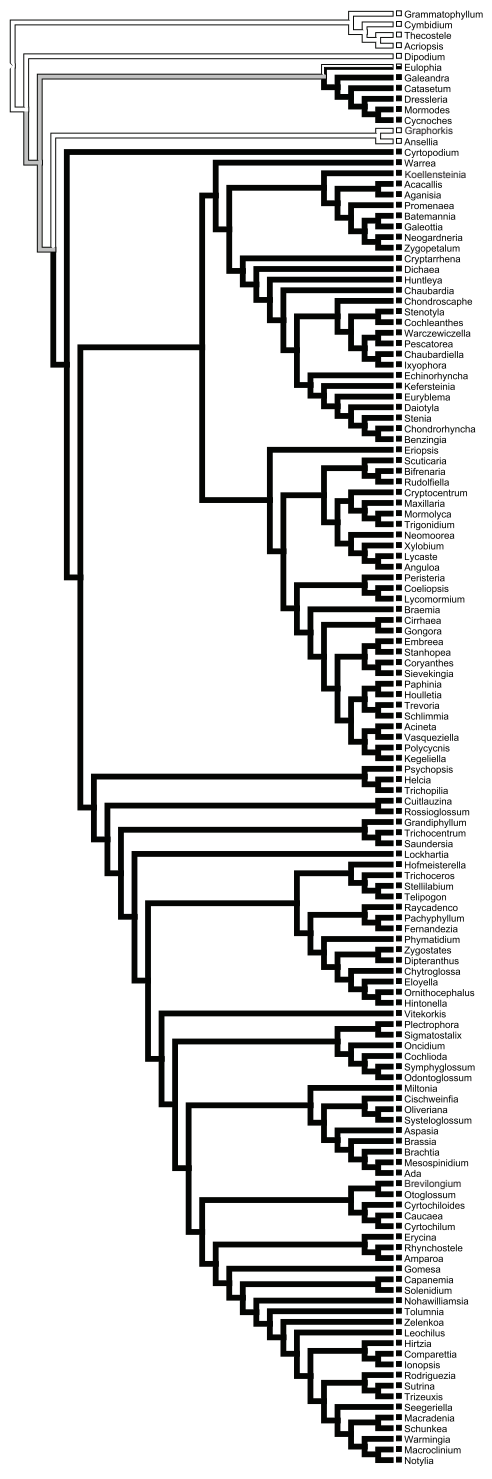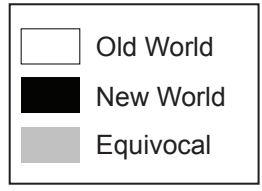

Supplement: supp_mcu253_aob-14600-s16.pdf [file supp_mcu253_aob-14600-s16.pdf]

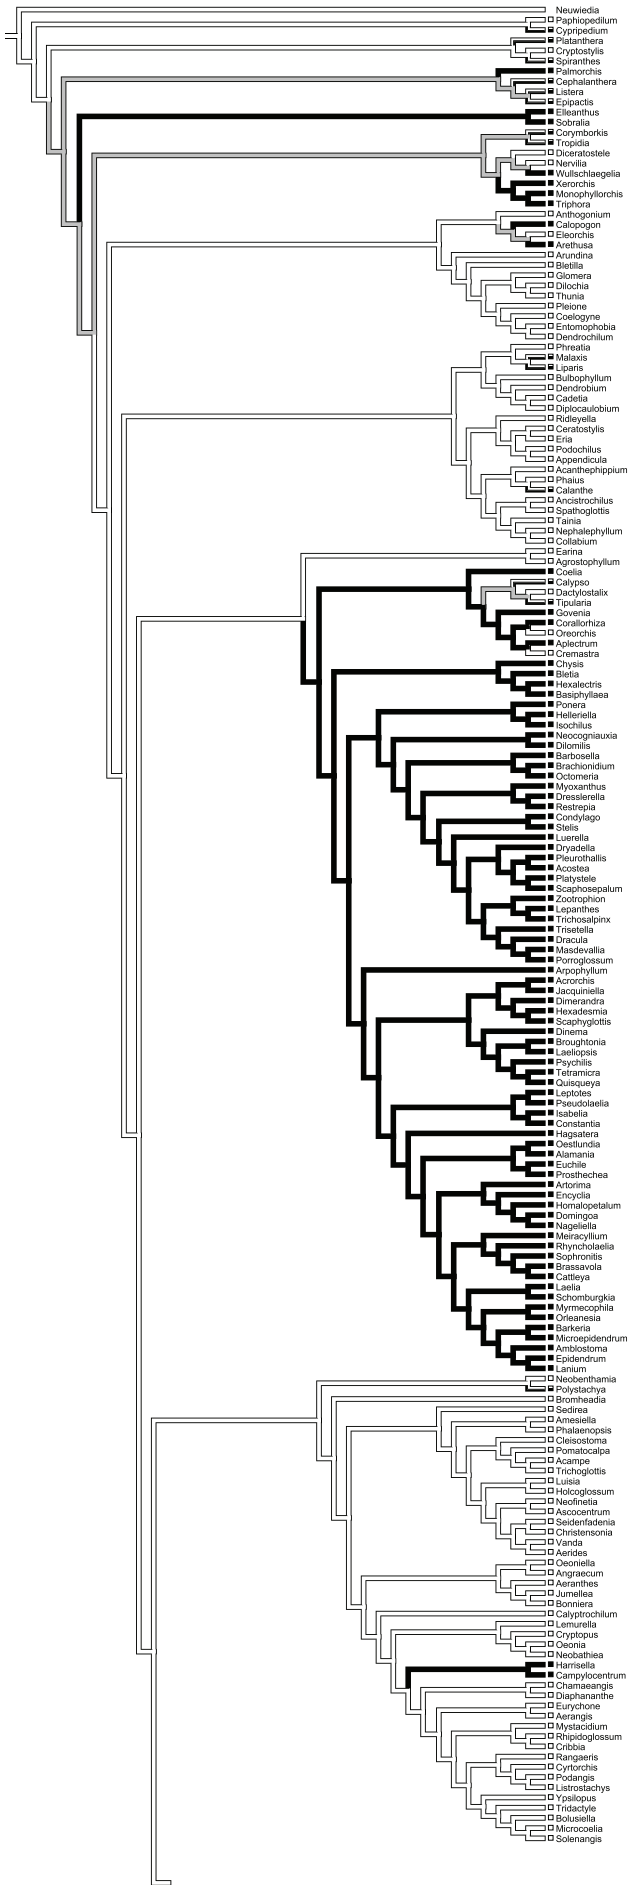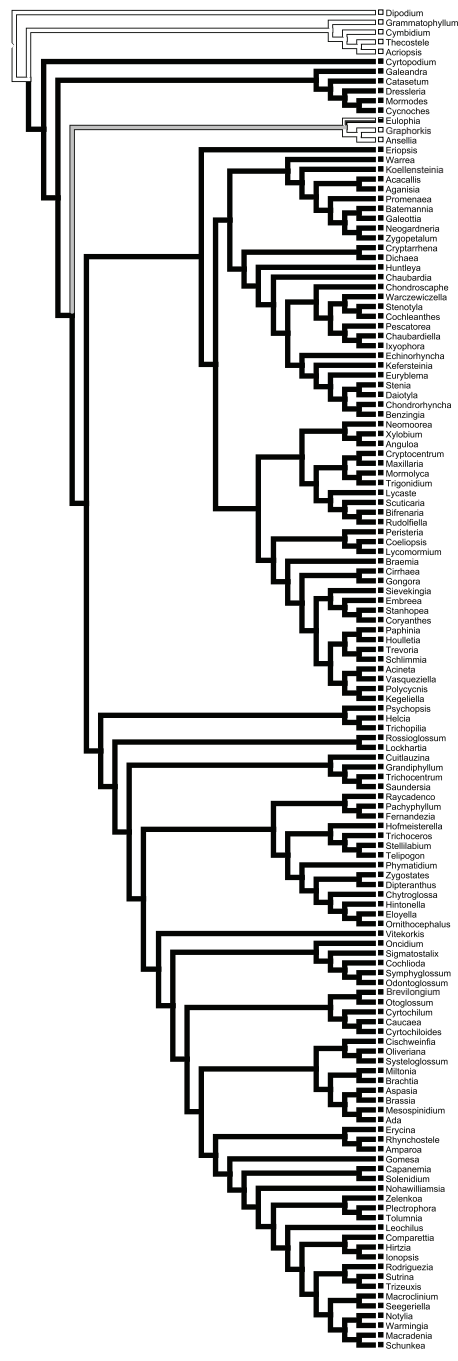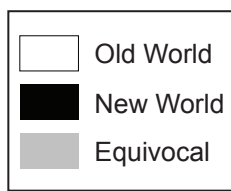

Supplement: supp_mcu253_aob-14600-s17.pdf [file supp_mcu253_aob-14600-s17.pdf]

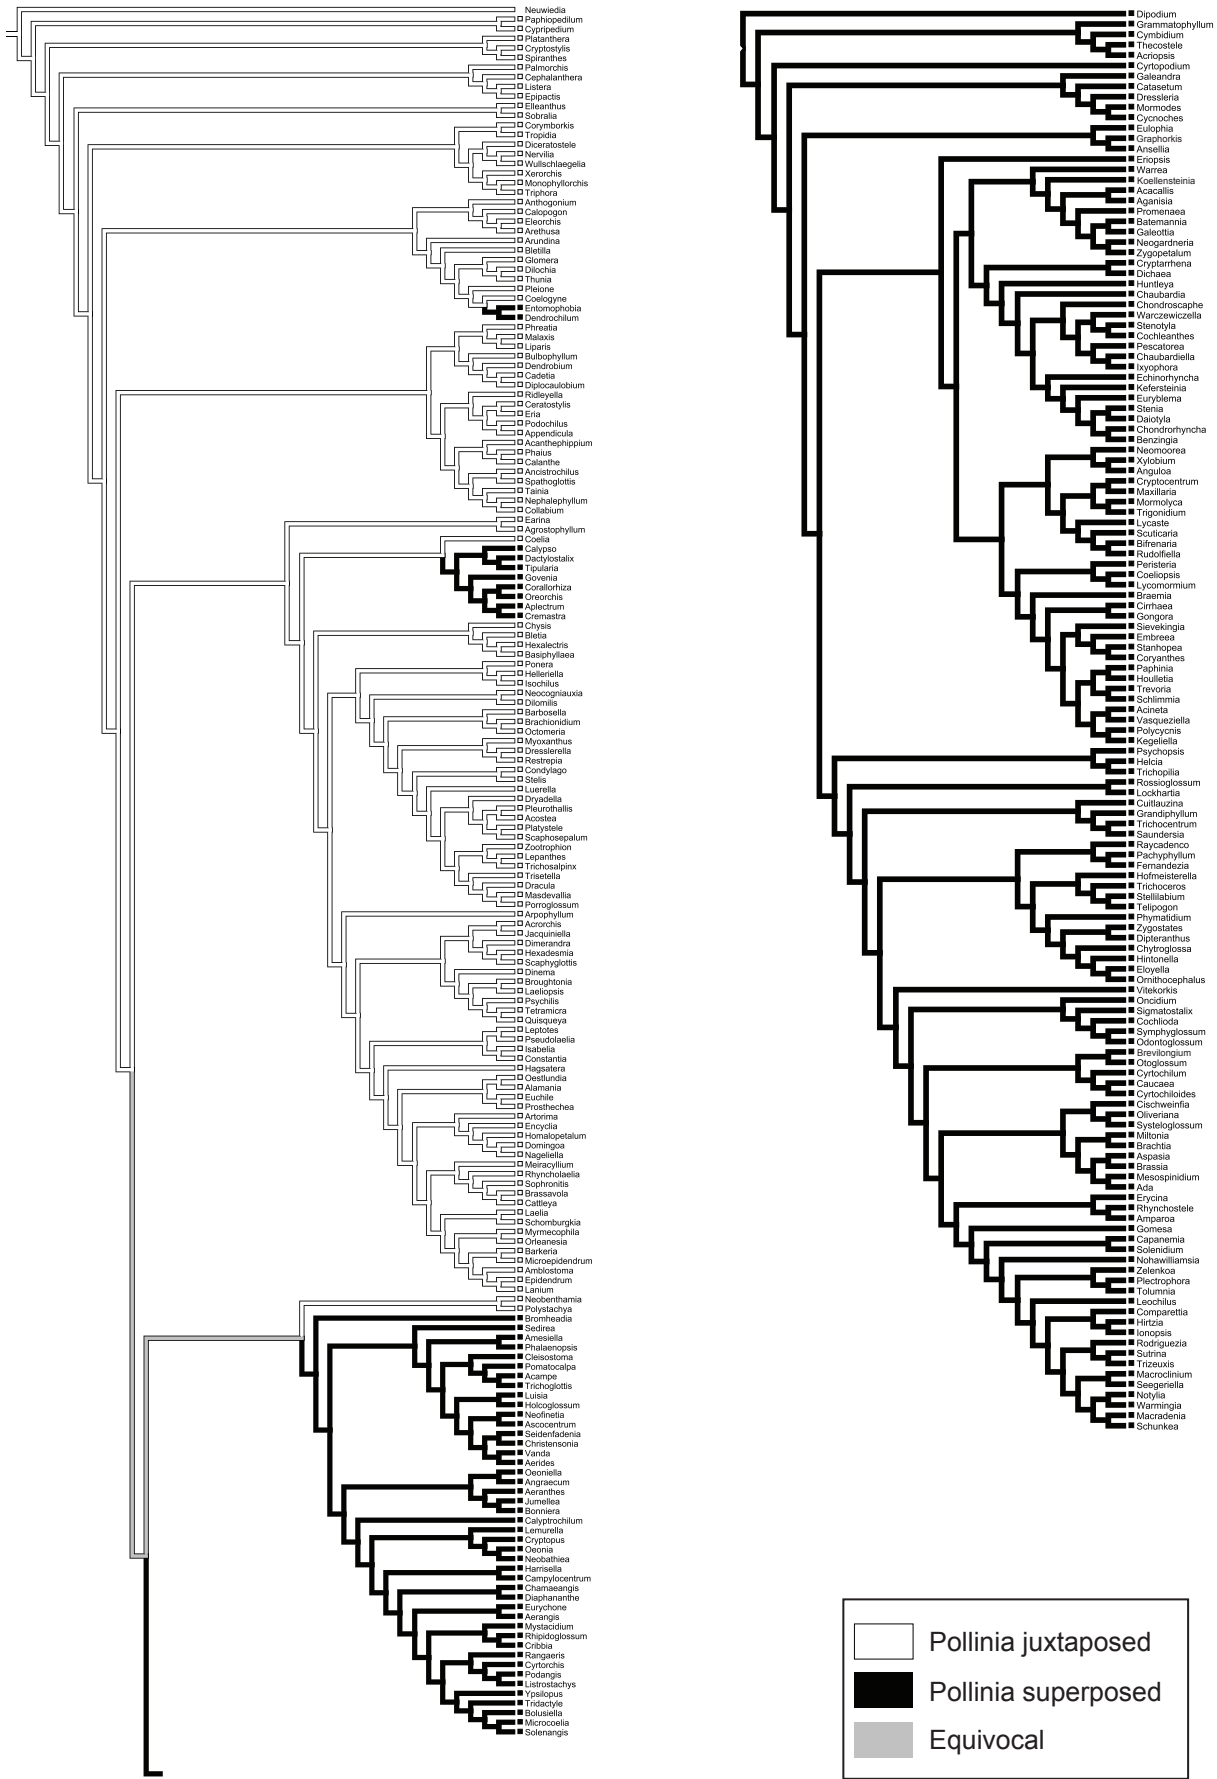

Supplement: supp_mcu253_aob-14600-s18.pdf [file supp_mcu253_aob-14600-s18.pdf]

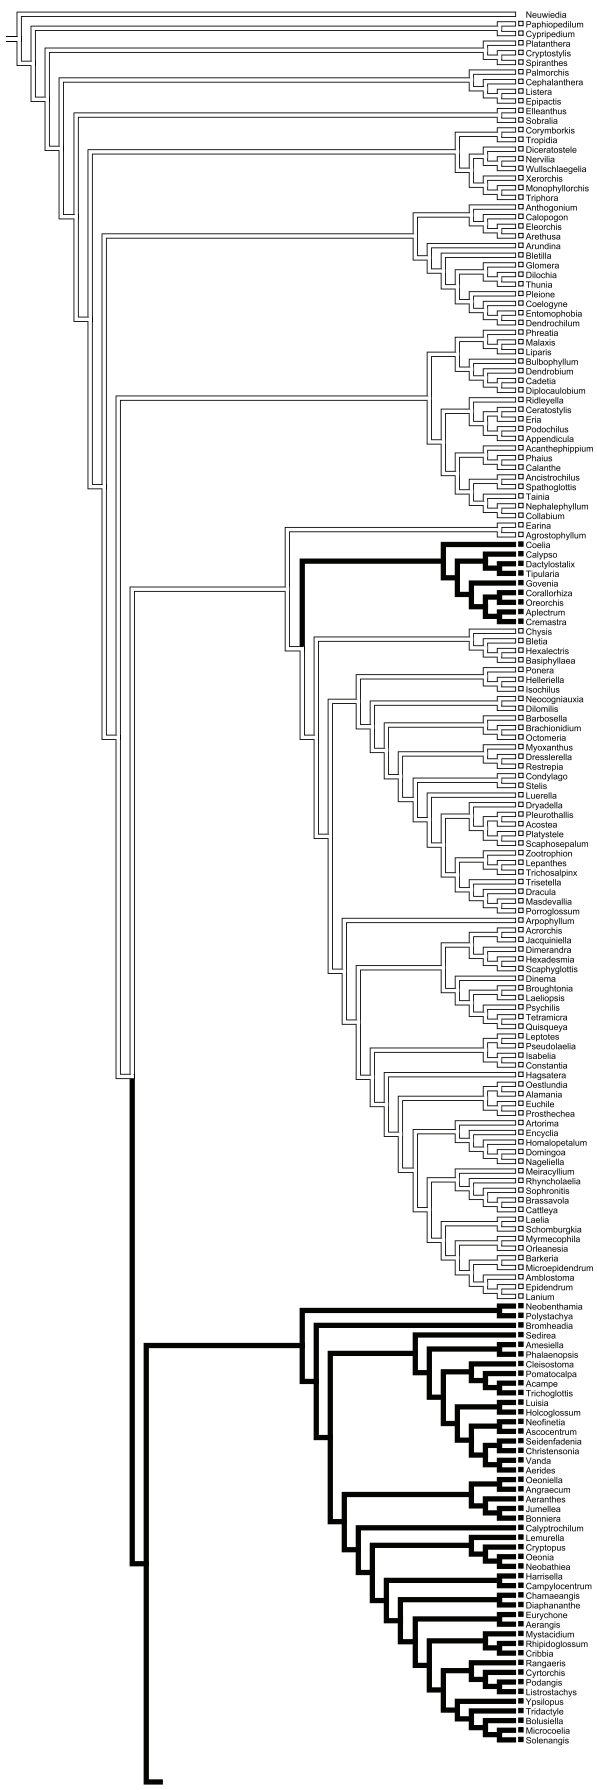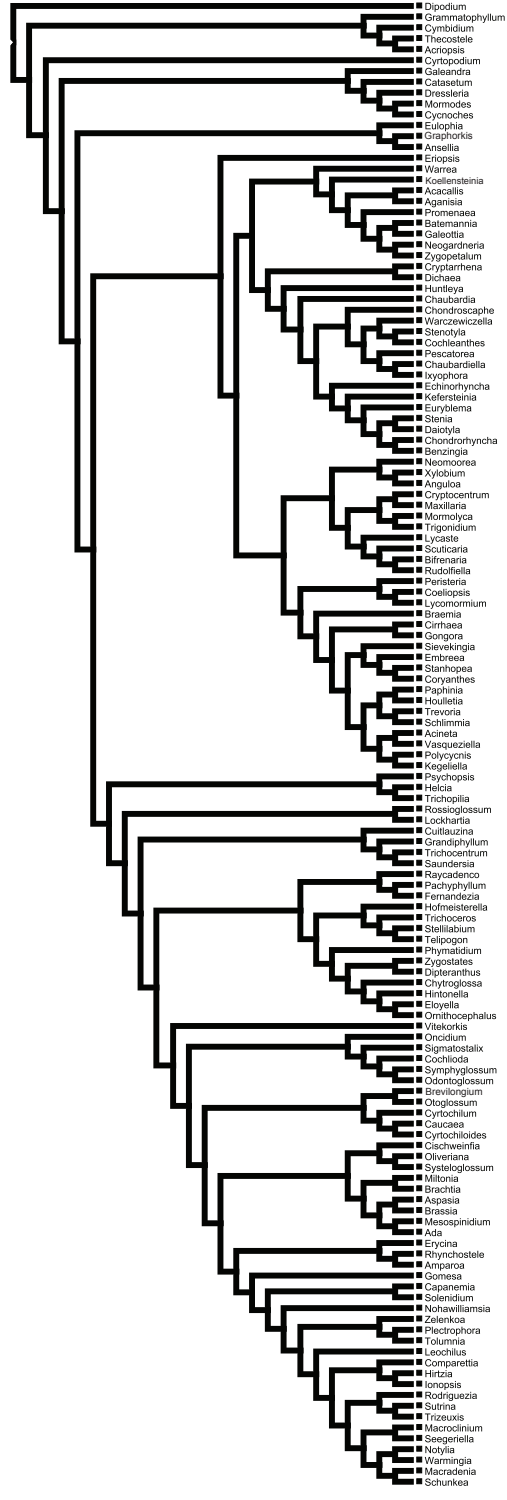

Early anther inflexion absent  
 Early anther inflexion present  
 Equivocal

Supplement: supp_mcu253_aob-14600-s19.pdf [file supp_mcu253_aob-14600-s19.pdf]

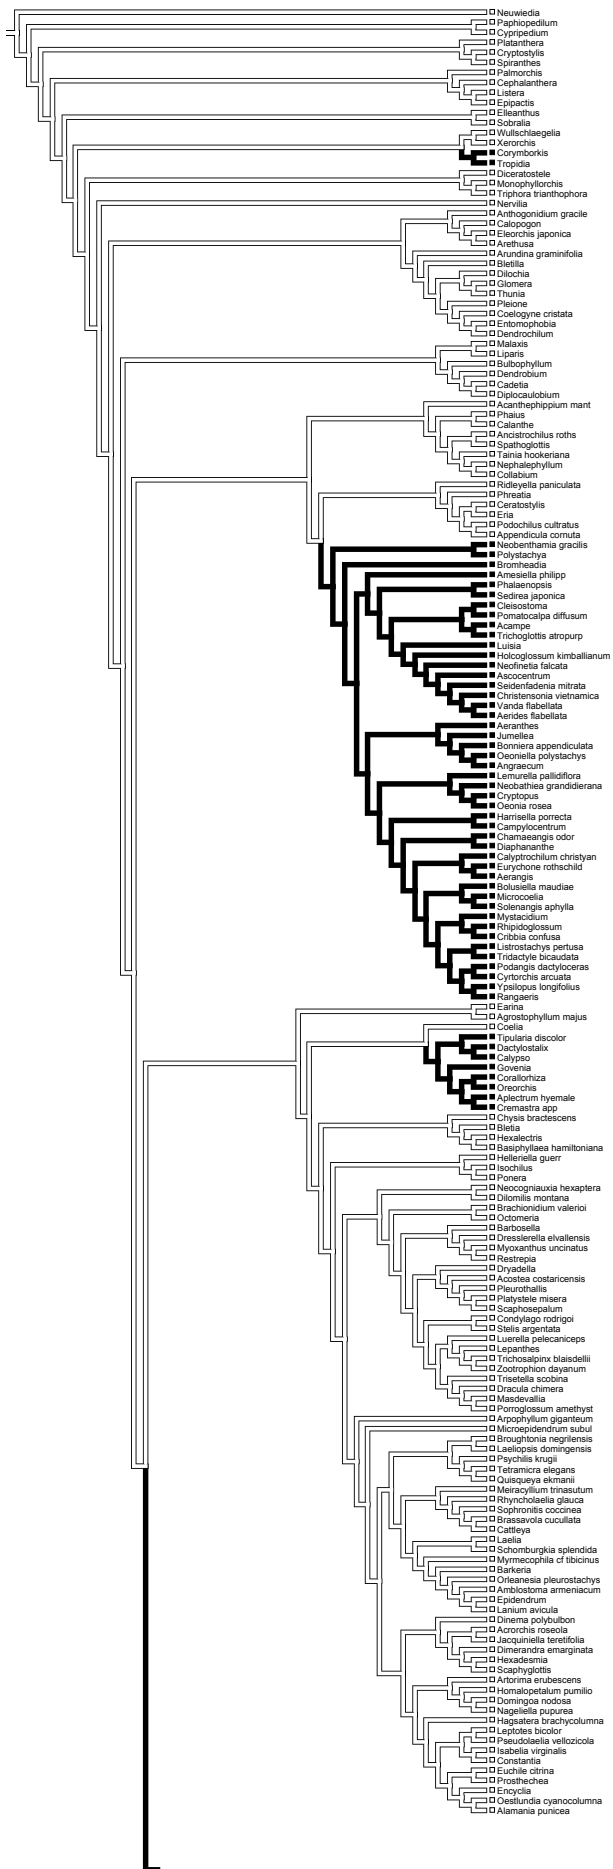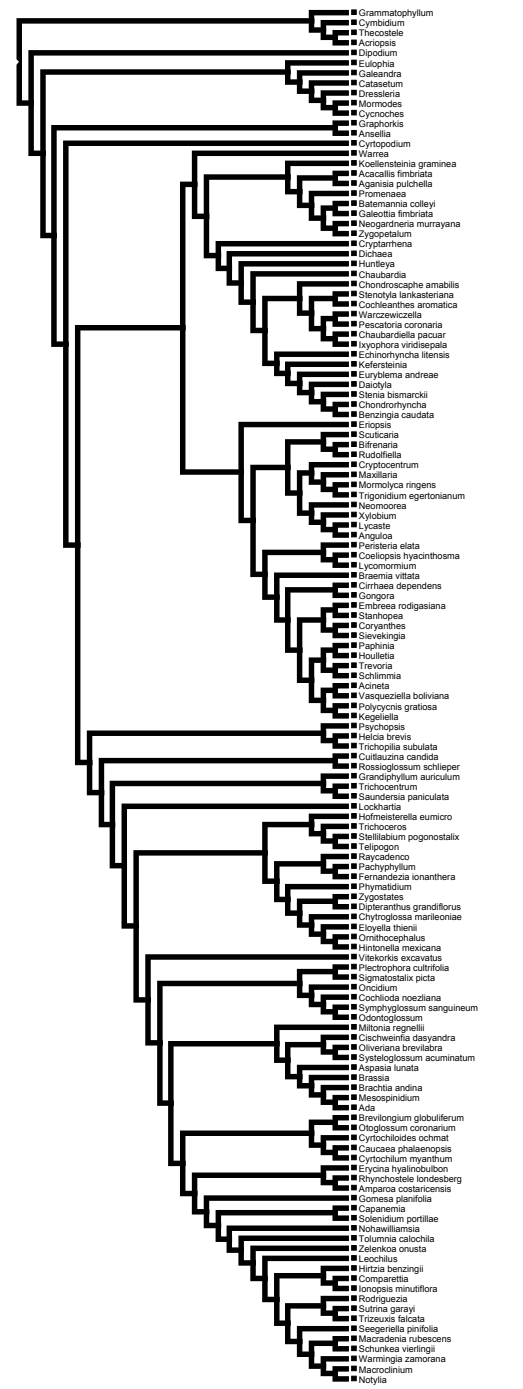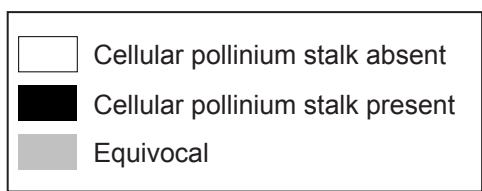

Supplement: supp_mcu253_aob-14600-s21.pdf [file supp_mcu253_aob-14600-s21.pdf]

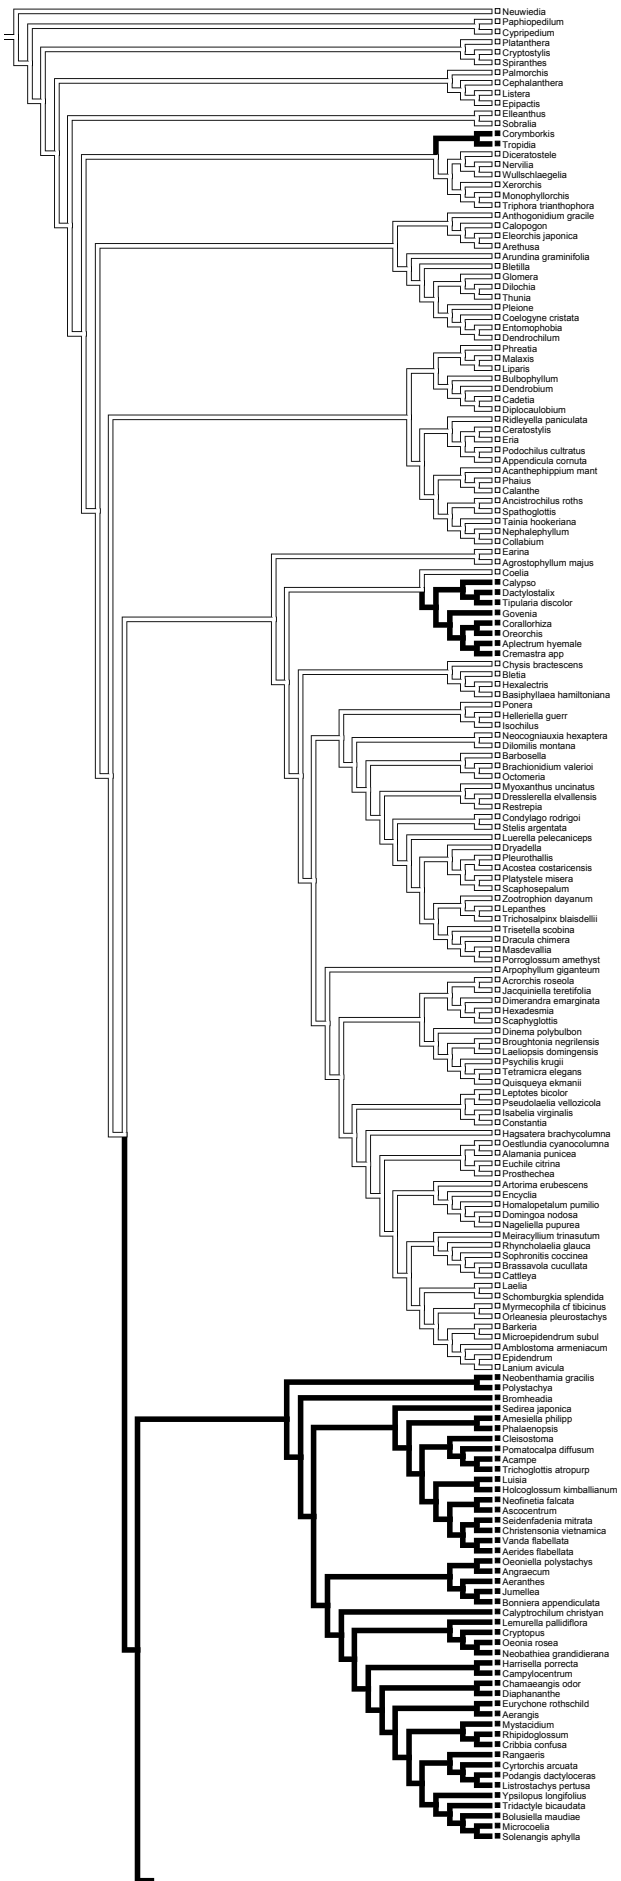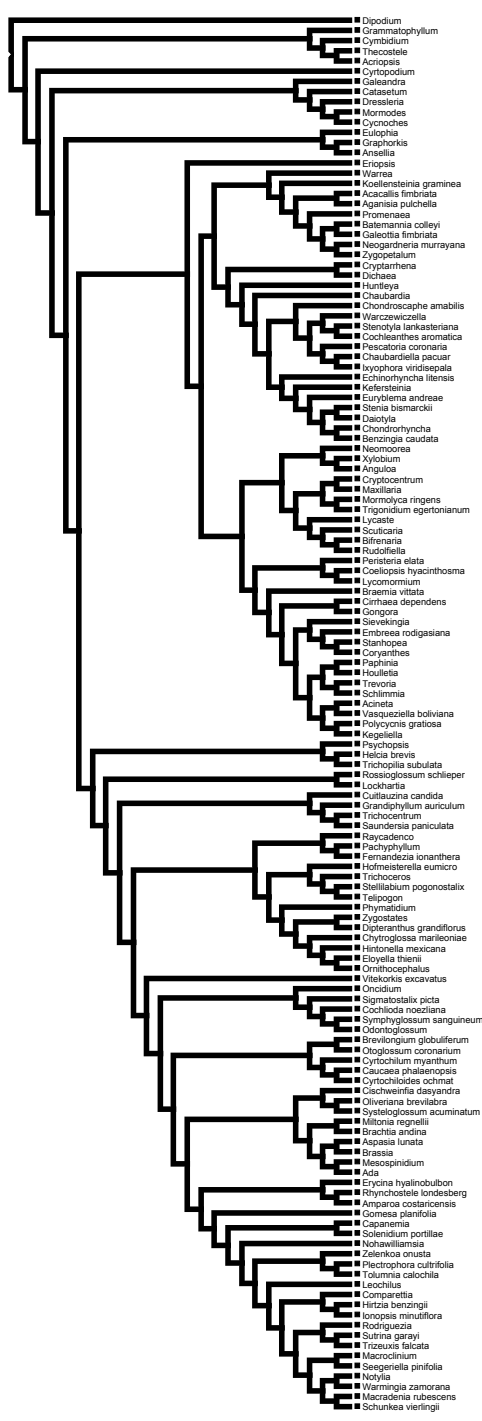

□ Cellular pollinium stalk absent  
 ■ Cellular pollinium stalk present  
 ▒ Equivocal

Supplement: supp_mcu253_aob-14600-s22.pdf [file supp_mcu253_aob-14600-s22.pdf]

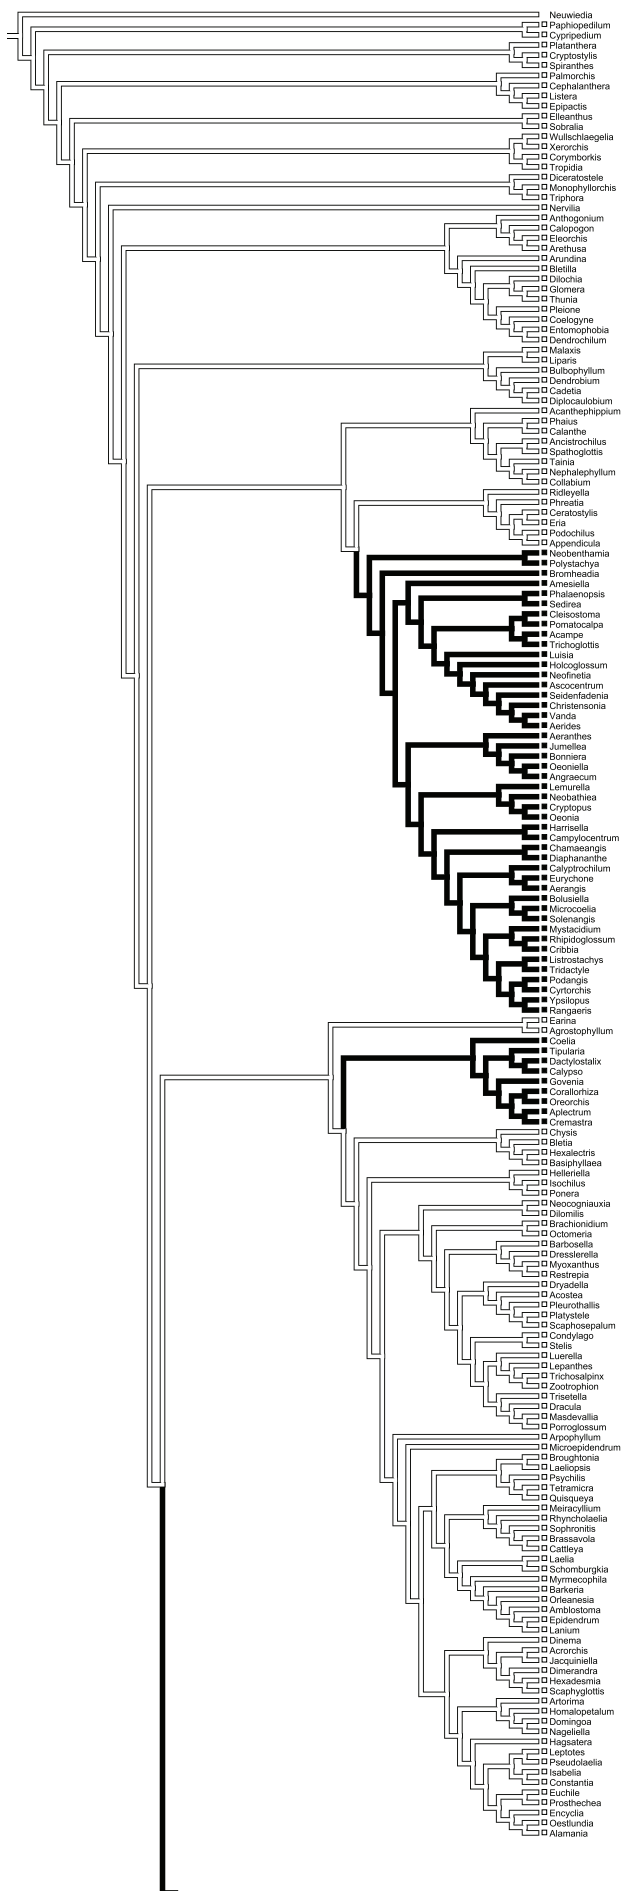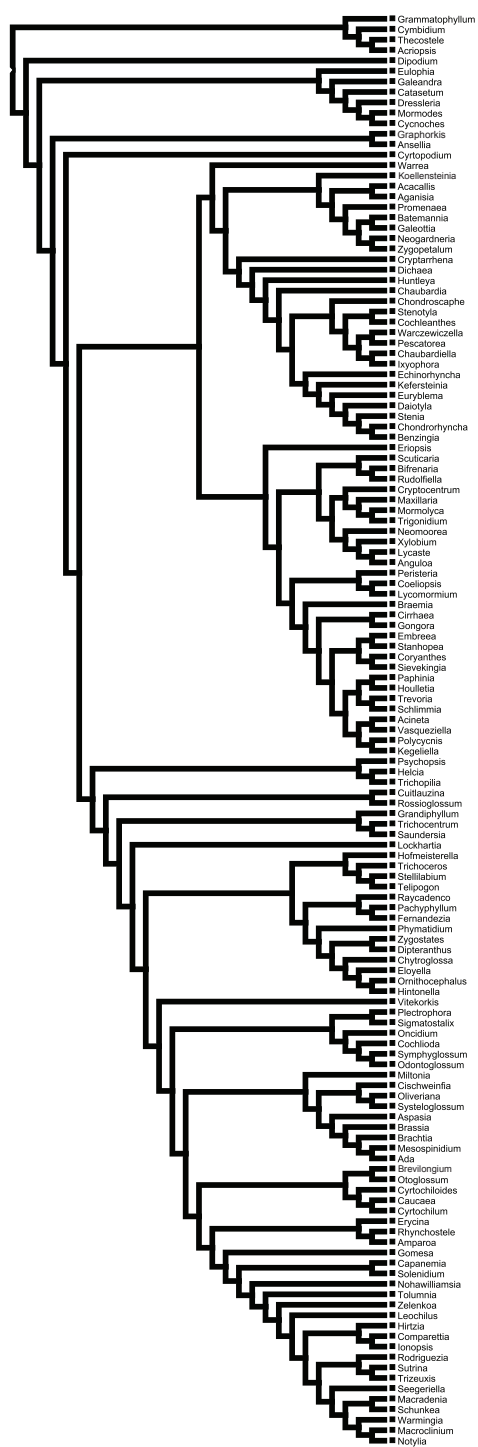

□ Early anther inflexion absent  
 ■ Early anther inflexion present  
 ▒ Equivocal

Supplement: supp_mcu253_aob-14600-s23.pdf [file supp_mcu253_aob-14600-s23.pdf]
